# Practopoiesis: Or how life fosters a mind

Danko Nikolić\*

*Department of Neurophysiology, Max Planck Institute for Brain Research, Deutschordenstraße 46, D-60528 Frankfurt/M, Germany; Frankfurt Institute for Advanced Studies (FIAS), Ruth-Moufang-Straße 1, D-60438 Frankfurt/M, Germany; Ernst Strüngmann Institute (ESI) for Neuroscience in Cooperation with Max Planck Society, Deutschordenstraße 46, D-60528 Frankfurt/M, Germany; Department of Psychology, Faculty of Humanities and Social Sciences, University of Zagreb, Croatia*

The mind is a biological phenomenon. Thus, biological principles of organization should also be the principles underlying mental operations. Practopoiesis states that the key for achieving intelligence through adaptation is an arrangement in which mechanisms laying a lower level of organization, by their operations and interaction with the environment, enable creation of mechanisms lying at a higher level of organization. When such an organizational advance of a system occurs, it is called a traverse. A case of traverse is when plasticity mechanisms (at a lower level of organization), by their operations, create a neural network anatomy (at a higher level of organization). Another case is the actual production of behavior by that network, whereby the mechanisms of neuronal activity operate to create motor actions. Practopoietic theory explains why the adaptability of a system increases with each increase in the number of traverses. With a larger number of traverses, a system can be relatively small and yet, produce a higher degree of adaptive/intelligent behavior than a system with a lower number of traverses. The present analyses indicate that the two well-known traverses—neural plasticity and neural activity—are not sufficient to explain human mental capabilities. At least one additional traverse is needed, which is named *anapoiesis* for its contribution in reconstructing knowledge e.g., from long-term memory into working memory. The conclusions bear implications for brain theory, the mind-body explanatory gap, and developments of artificial intelligence technologies.

## 1. Introduction

To help solve the brain-body problem (Descartes 1644; Popper 1999; Chalmers 1999; Rust 2009), systems neuroscience needs to near-decompose (Simon 1994) the complex biology of the brain into simple components. Likewise, biology is still in a need of a general theory of interactions that would explain relationships between its different levels of organization (Noble 2008a, 2008b; Bateson 2004). The present work is an attempt to develop a theory that satisfies both of these needs.

The heart of the present approach can be illustrated through the role that plasticity mechanisms play in neural networks. Be it a biological network or one simulated on a

computer, without plasticity mechanisms, it would be impossible to endow the network with the structure necessary to accomplish its tasks. Plasticity mechanisms are the means of steering the network into the desirable state of operation. Once created, the network offers another mechanism of equal steering importance: neural activity. The muscles and skeleton of a body provide machinery to generate movement and behavior. But they are useless without a network of neurons, which controls those movements. Neurons with their electro-chemical activity, and through inhibition/excitation, steer effectors and ultimately give life to the motion of the body. The present approach emphasizes that what plasticity is for a network, the network is for behavior: In both cases there is an enabling force. Both forces need to work well, and they lie in an organizational hierarchy: The rules of plasticity are organizationally lower than network anatomy, and anatomy is

---

\* danko.nikolic@gmail.com; www.danko-nikolic.com

organizationally lower than the generated behavior. It is always that higher levels are a result of operations of lower levels and not the other way around.

The present work generalizes this lower-to-higher relationship and proposes a formal theory. This makes it possible to ask what happens if there are not only two adaptive mechanisms (plasticity and neural activity) but more. Would more levels produce more intelligent behavior and how many levels are really used by biological systems?

The theory is named *practopoiesis*—derived from Ancient Greek words *πρᾶξις* (*praxis*), meaning “action, activity, practice” and *ποίησις* (*poiesis*), from *ποιέω* (*poieo*), “to make”. The term *practopoiesis* refers to “creation of actions”, emphasizing the fact that physiological mechanisms at any level of adaptive organization operate through actions. For example, gene expression mechanisms act, plasticity mechanisms act, and neurons act. The name *practopoiesis* is also a tribute to the theory of autopoiesis (Maturana & Varela 1980, 1992), which is one of the precursors to the present work—providing the insights that the process of creating new structures, or *poiesis*, in biological systems underlies both the physiology of an organism and its mental operations.

## 2. Practopoiesis: A general theory of adaptive systems

One of the key postulates of *practopoiesis* is the necessity of interactions with the environment. The idea is that each adaptive mechanism, at any level of organization, receives its own feedback from the environment. That way, *practopoiesis* follows the traditions of the ecological approach to mental operations (Gibson 1977, 1979), enactivism (Varela et al. 1991; Noë 2012), externalism (Holt 1914; Brooks 1991) and other works concerning situated and embodied cognition (e.g., Lakoff & Johnson 1980; Damasio 1999; McGann et al. 2013; Di Paolo & De Jaegher 2012), and robotics (Brooks 1999). Also, various preceding works considering feedback interactions (Friston 2010; Shipp et al. 2013; Friston et al. 2012; Bernstein 1967; Powers 1973) provide important background for the present work.

*Practopoiesis* can be fundamentally considered a cybernetic theory. Cybernetics studies control systems based on feedback loops (e.g. Wiener 1961) (Figure 1A). *Practopoiesis* is an extension

in a sense that it explains how systems obtain their cybernetic capabilities i.e., how they learn what and where to control. Hence, *practopoiesis* can be understood as a form of a second-order cybernetics, or cybernetics-of-cybernetics (Heylighen & Joslyn 2001; Glanville 2002; von Foerster 2003). *Practopoiesis* is grounded in the theorems of cybernetics—foremost, in the law of requisite variety (Ashby 1958; Beer 1974, 1979) and the good regulator theorem (Conant & Ashby 1970).

### 2.1 Three main telltale signs of *practopoietic* systems

To determine whether a system has the capability to learn to control these properties must be observed:

- 1) *Monitor-and-act machinery*: An adaptive system must consist of components that are capable of detecting conditions for a necessity to act, and of acting. These components monitor their own surrounding world, make changes, and then evaluate the effects e.g., to determine whether more action is needed.
- 2) *Poietic hierarchy*: The monitor-and-act units are organized into a hierarchy in which low-level components, by their actions, create, adjust, service and nourish high-level components. Once created, higher-level components should operate on their own i.e., without further support from the lower-level components. That is, new physical structures should be created for implementing higher-level monitor-and-act units.
- 3) *Eco-feedback*: Monitor-and-act components receive necessarily feedback from the environment to which the system is adapting.

These properties can be illustrated by a simple interaction graph (Figure 1B): The monitor-and-act units operating at the top of the hierarchy can be described as classical cybernetic systems (as in Figure 1A). However, other units, lower on the hierarchy, add complexity to the system. These units monitor the effects that the top of the hierarchy produces on the environment and, when necessary, make alterations. For as long as higher-level components satisfy the needs of an organism, there will be no need for changes at lower levels of system organization. But if

higher-level components are unsuitable, they are being poietically adjusted. For full functioning, two types of feedback from the environment are required, one for each level (Figure 1B). In case that a low level fails to receive feedback from the environment but instead receives feedback only from within the system, the system's capability to adapt to the environment at that level of organization is lost. Thus, no separate levels of practopoietic organization can be claimed.

## 2.2 The main desideratum: Cybernetic knowledge

To work properly and harmoniously with an environment, every component of a system must be adjusted according to its environment. The proper adjustment can be referred to as *cybernetic knowledge* of that component e.g., knowledge on when to act and how (Ashby 1958). Cybernetic knowledge is necessarily subjected to Conant & Ashby's good regulator theorem (Conant & Ashby 1970), stating: "any successful control mechanism must be a model of the system that it controls". That is, one can deal with the surrounding world successfully only if one already possesses certain knowledge about the effects that one's actions are likely to exert on that world<sup>1</sup>. Maturana and Varela (1980, 1992) expressed it as: "All doing is knowing and all knowing is doing."

The combination of poiesis and eco-feedback has the following implication: The process of building the system is also the process of adapting the system, which is also the very process of acquiring cybernetic knowledge. Building a system through interaction with an environment and adjusting to it cannot be distinguished from acquiring cybernetic knowledge about this environment. That way, newly created structures become a model (Conant & Ashby 1970) of the system's environment. For example, variation in phenotype for the same genotype (Johanssen 1911) is a form of practopoietic extraction of knowledge.<sup>2</sup>

## 2.3 Knowledge requires variety

The total amount of cybernetic knowledge deposited within a system is related to the total number of different states that the system can assume while interacting with the environment, and is referred to as the *cybernetic variety* of the system. The demands on variety are determined by Ashby's *law of requisite variety* (Ashby 1958;

Beer 1974, 1979), which states that for a successful control of a system, the system that controls has to have at least as many states as the system being controlled. Thus, being a good model of the environment entails a sufficient number of states, which is a pre-requirement to store a sufficient amount of cybernetic knowledge within the systems.

## 2.4 Practopoietic transcendence of knowledge: Generality-specificity hierarchy

The contribution that practopoietic theory brings on top of the existing cybernetic theory is the introduction of the adaptive hierarchy. This hierarchy implies a specific relation between the cybernetic knowledge that drives a poietic process and the knowledge that has been extracted through that process: The knowledge that can be instilled at a new level of organization is always limited by what the system had known prior to the process of poiesis. Kant referred to this limitation as transcendence of knowledge (Kant 1998). In machine learning, this system property is known as inductive bias (Mitchell 1980).

A higher level of organization contains knowledge about how the environment has responded to the actions at lower levels. Consequently, the relationship between knowledge levels can be described as a change in knowledge *specificity* along the organizational hierarchy. Knowledge at a higher-level system organization is always a specific case of more general knowledge at a lower level of organization.<sup>3</sup>

This relation can be shown even in the simplest, non-biological forms of cybernetic systems. For example, a thermostat with a sensor and a heater can be deemed a simple monitor-and-act unit possessing cybernetic knowledge on how to keep a space comfortably warm. This unit has two levels of organization, general and specific: The general knowledge of that system can be expressed as a relation between the *input* (current temperature) and the *output* (heating intensity). For example,  $output = (target - input) / 3$ . Specific knowledge is then derived by the actions of this controller. For example, specifically, right now *input* may be 35, and *target* may be 20. The needed *output* is thus -5.

In biology, an example of the generality-specificity relation is the general rule about when and which proteins should be synthesized versus the specific proteins that have been

synthesized. The latter reflects the properties of a particular environment within which the system operated recently, whilst the former reflects the properties of the environment across a range of time and space covered by the evolution of the organism. Thus, a phenotype will always contain more specific knowledge than the genotype.

The generality-specificity relationship applies not only to the gene-to-protein relationship but also to higher levels of system organization. The anatomical connectivity of a neural system reflects more general cybernetic knowledge than the neuronal activity: The anatomy contains knowledge on what to do in general, across a range of sensory inputs, whilst the current electrical activity of the network contains the knowledge of what is going on right now.

The graphs of interactions within real cybernetic systems (e.g., Figures 1A, B) can be quite complex if the variety of the system is large. Hence, *knowledge graphs* can be introduced, with which the essential practopoietic relationships between different levels of knowledge organization can be illustrated. Figure 1C-left illustrates the simplest knowledge graph for the relationship between the architecture of a control system (e.g. a thermostat) and its current state. The knowledge provided in the form of architecture is used to extract more specific knowledge, in a form of system state (the sizes of the circles in knowledge graphs can be used to indicate in relative terms the total variety of each level).

Additional mechanisms may increase the adaptability to the system in a form of adjusting system architecture (Figures 1B and 1C-right). Such eco-feedback adjustments are known as supervised learning in artificial systems e.g., the back-propagation algorithm (Rummelhart et al. 1986) (illustrated in Figure 2A as an interaction graph), and in biological systems as activity-dependent plasticity (Dubner & Ruda 1992; Ganguly & Poo 2013) (illustrated in Figure 2B as a knowledge graph). In both cases, the system has three levels of organization. Note that the total number of levels that possess cybernetic knowledge is always larger by one than the number of poietic mechanisms operating within the system (indicated by arrows in knowledge graphs). This is because the top level is the output<sup>4</sup> that affects the environment and does not have poietic effects on the system<sup>5</sup>.

In Figure 2, the knowledge stored in the rules of the plasticity mechanisms lies at the lowest level

of organization. The application of these rules leads to extraction of new knowledge at the anatomical level. The application of anatomical knowledge leads to the extraction of new knowledge at the highest level of organization—the activity of neurons and consequent generation of input-output interactions i.e., behavior. Thus, ultimately, every behavioral act is a specific expression of the general knowledge stored in our learning mechanisms (i.e., our genes). Our genes know what is good for our survival and proliferation in general. Our behavioral acts know what should be done specifically in a given situation—right now.

In conclusion, the set of all kinds of specific knowledge that a system can possibly learn is limited by the general knowledge that a system begins its life with. One cannot learn specifics for which one has not already pre-evolved a more general learning system. Ultimately, every skill that we acquire and every declarative fact we memorize is a specific form of general knowledge provided by our genes (e.g. Baum 2004).

## 2.5 *Traverse is a generator of variety*

The introduction of the practopoietic hierarchy implies that the transition from high to low generality of knowledge is an active process. We refer to this process here as an *adaptive traverse of knowledge*, or simply a *traverse*. A traverse is a process, or a set of operations, by which changes are made through system's interaction with the environment such that the system has acquired new operational capabilities, or has directly adjusted its environment to its needs. Formally, we can define a traverse as a process in which more general cybernetic knowledge, has been used throughout the operations of the system to extract more specific cybernetic knowledge.

For example, a system undergoes a traverse when the general knowledge of network plasticity mechanisms—about when and what to change anatomically—, creates new functional capabilities—e.g., on when and how to respond to sensory stimuli. Another traverse is when this network operates by closing sensory-motor loops and behaving. In both cases, more general knowledge is applied to create more specific one. A yet another example of a traverse is when gene expression mechanisms, under the influence of environmental factors, generate anatomical structures. Here, gene expression fosters new



functional capabilities of the organism. A biological system undergoes a traverse also through operations of its organs. A digestive tract has an important enabling role for the organism. And so does the immune system, which, with its operations, realizes new, functionally healthier state of the organism.

In general, a traverse is when more general cybernetic knowledge of monitor-and-act units is used to produce certain beneficial effects for the system in a form of implementing new, more specific cybernetic knowledge. The latter is then considered higher on the organizational hierarchy than the former.

Thus, creating new structures is equivalent to the system's adaptation, which is equivalent to extracting cybernetic knowledge, which can be expressed as a traverse from general to specific knowledge. A traverse is the central adaptive act of a practopoietic system.<sup>6</sup>

Traverse is also how a system generates cybernetic variety. A small number of general rules can be used to extract a large number of specific ones.<sup>7</sup>

And the total number of traverses matters. Some systems have a single traverse (e.g., thermostat, cybernetic feedback loop in Figure 1A), while others have multiple traverses (e.g., living systems, neural networks; Figure 2). Importantly, additional traverses provide more capability to generate variety—even when the system is leaner: One system may use huge resources to store all actions for all situations that could possibly be encountered. Another system may compress that knowledge to a few simple rules and infer in each situation the relevant actions.<sup>8,9</sup> The latter one is more adaptive.

## 2.6 Eco-feedback and practopoietic cycle of causation

In practopoietic systems, interactions need to close the causal chain of events through the highest level of organization. Evolution does not know whether a change is good until a full-fledged organism is developed to interact with the environment. This requires involvement at the top of the hierarchy i.e., behavior. Similarly, genes do not fully know which proteins to synthesize until the organism interacts with the environment at the highest level of organization.

Thus, the feedback loop is closed by generating behavior and then getting feedback on the effects that this behavior exerted. This follows from the poietic properties of systems: Actions of low-level mechanism produce effects on higher-level mechanisms, which then produce effects on the environment (Figure 1B). In fact, in practopoietic systems, there is no way around this involvement of the top. If the causality flowed in any other way, a shortcut would have been found to affect the environment directly, without the higher levels of organization. The system may act faster, but would lose its adaptive capabilities, the degree of loss corresponding to the number of organization levels skipped due to the shortcut.

Thus, as illustrated in Figure 1B, upward causation should occur within the system, and this is a process of poiesis. In contrast, downward causation should take the path outside the system and through *eco-feedback*. This is the only way for the poietic process to receive feedback from the environment, and for the system as a whole to extract cybernetic knowledge and become a good regulator. For example, a lack of certain nutrients may cause the expression of certain genes, which may be in turn responsible for plastic changes in the nervous system. These changes can then affect behavior patterns in such a way that the organism successfully obtains the needed nutrients, which eventually ceases the expression of the said genes. This entire loop of internal upward poiesis and external downward feedback through multiple levels of organization is referred to as the *practopoietic cycle of causation*.

## 2.7 Equi-level interactions

In any given adaptive system the total number of practopoietic levels of organization is likely to be smaller than the total number of monitor-and-act units of that system. For example, so far, we discussed three possible traverses of knowledge relevant for a nervous system—based respectively on neural activity, plasticity, and evolution. In contrast, a nervous system consists of many billions of monitor-and-act units that take many different physiological forms. Therefore, many units will not be related hierarchically, but will operate at the same level of organization and thus, will undergo *equi-level interactions*.<sup>10</sup>

Equi-level interactions occur when physiological events use one the same feedback from the

environment. For example, DNA transcription may be triggered by environmental feedback but much of the remaining events may be pre-determined through that same feedback: a protein synthesis and its incorporation into the cell membrane as a new ion-channel. If there are no separate environmental feedback sources controlling protein folding and membrane insertion, then this entire process from DNA transcription to the insertion of the ion-channel can be considered equi-level. The first additional adaptive level may be at the point where the ion-channel contributes to neuron's depolarization—as depolarization is likely to be driven by sensory inputs from the environment. From that point on, again, the events may occur equi-level: For example, a reflex may be formed whereby sensory inputs, action potential generation, neurotransmitter release, and muscle contractions all receive the same sensory feedback from the environment.

Equi-level system components need not even interact directly and can still ensure adaptability of the system as a whole<sup>11</sup>. This is because in practopoietic systems most interactions occur through the higher levels of organization: Actions of component A affect the environment, which then affects component B in a form of B's eco-feedback. Being equi-level, component B similarly affects the environment and thus, steers the eco-feedback of A. Hence, equi-level components interact by closing the practopoietic cycles of causation. For example, genes expressed in one cell may affect our behavior and depending on how eventually environment responds to our behavior, expression of other genes in another cells is affected. Similarly, a neuron in one part of the brain may not directly inhibit/excite a neuron in another part of the brain but can still affect its activity by having effects on the overall behavior of the organism. For example, a motor neuron in the spinal cord may induce body movements that change the image projections on the retinae, affecting hence the activity of the entire visual system.

These indirect equi-level interactions based on closing the practopoietic cycle of causation may account for the majority of all interactions among units that operate at the same level of organization. Thus, the top level of organization with its output function towards the environment is the glue that puts the interactions among all of the components of the system together. By relying on such indirect interactions, the system's knowledge can grow linearly with its size; it can add new monitor-

and-act units without having the burden of implementing the interaction pathways, the combinatorics of which grows faster than linearly. The organism's interaction with the environment does that job.

Even the monitor-and-act units in different brain areas (e.g., visual cortex vs. infero-temporal vs. prefrontal cortex) largely operate at the same organization level. Despite the rich axonal interconnectivity, the lower organization levels of these brain areas, such as their plasticity mechanisms (i.e., *top-1*, *top-2*, etc. in Figure 1C), mostly interact through the consequences produced on the organism's behavior (e.g., Yoshitake et al. 2013)<sup>12</sup>.

## 2.8 Downward pressure for adjustment

Understanding conditions that initiate changes to the system at the low levels of organization is important for understanding adaptive practopoietic systems. This is the problem of downward causation (Noble 2008a, 2008b; Bateson 2004; Campbell 1990; Bedau 2002). In practopoiesis, downward causation occurs through eco-feedback. The top level of organization acts on the environment, and then the environment informs lower levels that the higher ones may not have performed their jobs successfully. That is, the signal for a need to act at lower levels is an event that has both of the following properties: i) it has been established in the past that this signal indicates a need for action, and ii) higher levels did not manage, for whatever reason, to eliminate that need (i.e., eliminate the signal).

In that case, through eco-feedback, the system experiences a *downward pressure for adjustment*: Changes are needed at lower levels of system organization in order to change—adaptively—the properties of the higher levels. In other words, by actions of monitor-and-act units laying at the bottom of the hierarchy a new system with new cybernetic knowledge is created at the top. For example, various metabolic indicators during a cold season affect gene expression such that an animal grows thicker fur; or changes in gene expression due to chronic nutritional deprivation create behavioral changes that force an animal to change its habitat.

As a result of such adaptive capabilities, the total variety of the system's interactions with the environment is much higher when observed across different demands from the environment,

than when the system is observed within relatively stable environmental conditions.

Downward pressure for adjustment always involves the environment and is often induced by novelties in the environment. In stable environments, low-level mechanisms experience little pressure for change. Downward pressure for adjustment triggers a practopoietic cycle of causation and thus, involves actions at the higher levels of organization. The changes made to higher levels often cannot be made quickly because there is no direct instruction on how to fix the problem. Low-level cybernetic knowledge gives certain strategies on how to approach the problem, but often does not give a direct solution. In those cases the solution is approached iteratively. The system must make one change and test the success of that attempt, and if it was not sufficient it may need to make another, maybe a different attempt, testing it again and so on.<sup>13</sup>

Downward pressure is exerted on neuronal plasticity mechanisms to adjust the anatomy of the system as a result of changes in the environment (new events). Every form of learning is a result of the pressure to fix discrepancies between the existing sensory-motor operations and those required by the surrounding world. The downward pressure is on making more efficient behavioral actions, percepts, memory recalls, etc. Similarly, evolution by natural selection can be under more or less pressure for change, when organisms are more or less adapted to the given environment. In either case, it is chiefly the environment that dictates when changes need to be made.

## 2.9 Intelligence: Traverses combined with variety

To analyze the possible limitations of the current brain theory and artificial intelligence (AI) algorithms, and to determine whether they can be improved by addition of a traverse, it is necessary to establish what additional traverses bring to the system's intelligence. We have made a case that more levels of organization give more adaptive advantages to a system. For example, adding organization levels at the bottom of the hierarchy can be useful. A network equipped with plasticity rules is more adaptive than the network without plasticity rules. Also, plasticity rules that evolve produce a more adaptive system overall than plasticity rules fixed forever<sup>14</sup>.

But adding organizational levels in the middle of the hierarchy can help adaptability too. A system that evolves an intermediate adaptive stage is more adaptive than a system lacking that stage. For example, genes do not act directly on the environment but create a nervous system, which then acts. Here, the nervous system plays a role of an intermediate adaptive stage.

Intermediate adaptive stages provide the space needed to adjust system's own properties i.e., to learn. A system that is limited in acting on the environment but is unable to act on "itself" such that it changes its own future interactions with the environment is much less adaptive than a system that is able to create the needed environment-driven changes of its own structure.

Practopoietic theory emphasizes the importance of additional traverses of a system for adaptability. The more organizational levels spanned by traverses, the better the coverage of the generality-specificity continuum of cybernetic knowledge. Thus, a system may possess a large amount of knowledge, but yet may not be very adaptable, much like a book may contain much information and still be unable to exhibit intelligence and rewrite itself, because it has no traverses. In contrast, a thermostat has one traverse and although it deals with only one variable at a time (it has low variety), in terms of practopoiesis, it is more adaptive than a book. A thermostat, with its traverse, has one form of interaction with the environment—one more than a book. Similarly, a computer may store much more information than the genome of the simplest bacteria (gigabytes as opposed to 1.3 megabytes of *Pelagibacter ubique*; Giovannoni et al. 2005) and yet, possibly due to its multiple traverses, a bacterium is a system of a higher degree of adaptability than a computer.

Despite this increase in adaptive levels in biological systems, their total adaptive power i.e., their intelligence, is given by a combination of the number of traverses and the total cybernetic variety possessed by the system. The systems that possess the same number of traverses are set apart by the amount of cybernetic knowledge. Additional knowledge can increase richness of behavior too. For example, a Braitenberg vehicle (Braitenberg 1984) consisting of two controllers can produce much richer dynamics than a single controller of a thermostat, and hence may exhibit higher intelligence. And the larger human genome can

produce more than the small genome of bacterium *Pelagibacter ubique* (~750 megabytes vs. 1.3 megabyte). Similarly, a human brain can produce richer behavior than a mouse brain due to the variety produced by the total number of cells.<sup>15</sup>

Nevertheless, the number of traverses makes a crucial difference for how a system can generate variety. With few traverses, the variety must be pre-stored, and the future needs already must be known at the time of creation. In contrast, with a larger number of traverses, the variety can be generated and adjusted as operations go on. The process of extraction of cybernetic knowledge ensures that this knowledge is appropriate for a given environment. Hence, systems with a larger numbers of traverses can be smaller in total size and yet, produce the same or higher amount of variety than systems with a smaller number of traverses. This has critical consequences for operations in unpredictable environments—those who's past is not necessarily a good predictor of their future. The less predictable the surrounding world is, the higher the advantage of a larger number of traverses. The traverses possessing more general cybernetic knowledge tell the system how to adjust to unpredicted events in the surrounding world. Systems without such a general knowledge are limited to knowledge with which they were born.

This brings us to a realization that all cybernetic knowledge must have a source, i.e. a level below that has extracted it. Knowledge of biological systems can be tracked down to Darwin's evolution by natural selection i.e., to the most fundamental piece of knowledge of all: It is good for the species to make small changes by chance. The knowledge of machines can be tracked down to human engineers—i.e., machines are extensions of the humans who create them and lie thus at the practopoietically higher levels of organization (e.g., *top+1*). It took billions of years of biological evolution to create bimetal and arrange it into a thermostat. Thus, the fundamentals of the cybernetic knowledge of machines can also be tracked down to biological evolution.

Adaptively more advanced machines i.e., more intelligent machines, should be able to extract their own cybernetic knowledge in high proportion and thus, reduce the role of humans. For example, a thermostat with additional traverses at the bottom of the hierarchy should be able to extract its own knowledge on how to keep a space comfortably warm. A robot should

determine its own behavioral actions to achieve its goals.

### 3. Characterizing systems of different adaptability levels

The central idea of practopoietic theory is that, depending on the number of traverses, there are limitations on how much a system can adapt even if the variety of the system is unlimited. Here we systematically characterize systems of different numbers of traverses, which are labeled as  $T_n$ , where  $n$  indicates that number. The most important is the difference in the maximum adaptive capabilities exhibited by systems that have two traverses, as presumed by the current brain theories, in comparison to those that have three traverses and thus, exhibit additional adaptive competencies.

#### 3.1 A $T_0$ -system: information and structure

A  $T_0$ -system does not have practopoietically operational capabilities. It exhibits zero traverses and has only one level of organization. A  $T_0$ -system is a part or a *structural* component of a larger system. A  $T_0$ -system can be adapted, but it does not perform any adaptation itself.

Any structural element of a system e.g., a bone in a body is a  $T_0$ -system, and so is any passive form of information storage, such as a book or DNA. Any tool or instrument, such as a knife, has a maximum of  $T_0$ -capabilities too. Also, active components e.g., a motor or a computation processor, have  $T_0$ -capabilities if they are not closing a loop with the environment to which the system adapts.

$T_0$ -systems are relevant for practopoiesis as constitutive components of larger, more adaptive systems. They provide support such as *structure* or *information* that is utilized within the system.

Hence, not any object or computation can be labeled  $T_0$ . To be granted the title, a component must be a functional part of an adaptive system and thus, must already have undergone certain steps of practopoietic organization and knowledge extraction.



### 3.2 A $T_1$ -system: control and deduction

A  $T_1$ -system exhibits one traverse and therefore, involves operations across two levels of organization. This system exhibits minimal adaptive capabilities. Its physical structure enables receiving inputs from the environment and sending outputs.

The cybernetic knowledge of that system may be austere, as in the case of a simple thermostat, or rich as e.g., stored within the connectivity pattern of a large neural network wired-up to input-output devices, enabling interactions with an environment.  $T_1$ -systems can close a loop with the environment in a continuous manner or in a discrete one i.e., acting only when specific conditions are met, for example when a threshold is reached. Hence, in its simplest form, a  $T_1$ -system can be described as a *control* mechanism, or as a *regulator*. Also, a variety rich  $T_1$ -system can be seen as an elaborate monitor-and-act machine—a device that responds to events in the environment.

A  $T_1$ -system can also be understood as a mechanism that extracts knowledge. More formally they can be said to implement *deduction of cybernetic knowledge*: The action for a specific case is deduced (at higher level of organization) from a general rule (at lower level of organization).

In biology, subsystems of an organism can be described as  $T_1$  when they perform *homeostatic* functions (Cannon 1932). For example, negative feedback loops for controlling body temperature are  $T_1$ -systems. The same is the case for the mechanism for regulating blood glucose levels (Ahima & Flier 2000). Reflexes e.g., a stretch reflex (Liddell & Sherrington 1924; Gurfinkel et al. 1974), can also be described as having a single traverse. The rate of gene-expression, which is regulated by a feedback loop, is a  $T_1$ -system. For example, the excess of tryptophan directly prevents further synthesis of that amino acid (Gollnick et al. 2005).  $T_1$ -systems are not limited to negative feedback but can implement positive-feedback loops too<sup>16</sup>. Human-made devices can be described, in general, as being limited to  $T_1$ -capabilities.<sup>17,18</sup>

The main limitation of  $T_1$ -systems is excessive variety that would be required to deal with real-life problems. Although such systems can implement in principle any mapping function, in real life this is not enough because the number of combinations of events that an animal or a person could possibly encounter in his/her life in all possible environments that it may live in

and in all possible situations that it may encounter, is way too large to be stored in a  $T_1$  physical system.<sup>19</sup> Instead, more flexibility is needed to learn selectively only about those environments in which the organisms actually happen to live.

### 3.3 A $T_2$ -system: supervision and induction

A  $T_2$ -system consists of two traverses and provides as much a whole new class of flexibility compared to  $T_1$ , as  $T_1$  adds to adaptability in comparison to a  $T_0$ -system. A  $T_2$ -system can be understood as granting *supervision* to a  $T_1$ -system in the form of machinery that monitors the effects that  $T_1$  produces on the environment and that has the cybernetic knowledge to adjust the  $T_1$  component whenever necessary. The need for adjustment may appear e.g., when properties of the environment change.

A  $T_2$ -system operates across a total of three levels of organization, the lower traverse relying on the most general form of cybernetic knowledge (the rules of supervision) and extracting knowledge of medium generality (the supervised properties of the system) and then, the higher traverse relying on that knowledge to extract an even more specific form of knowledge (the actual interaction with the surrounding world). Thus, a  $T_2$ -system can cover more area of the generality-specificity continuum than  $T_1$  can (Figure 2B vs. 1C-left).

The additional adaptive capabilities of a  $T_2$ -system stem from the properties of its middle level of organization. While the cybernetic knowledge at the bottom of the hierarchy is always fixed and the one on the top of the hierarchy changes perpetually with even the slightest change in the environment, the middle level in a  $T_2$ -system provides a place to store temporary knowledge that may be valid for a while, but which may be changed later if circumstances require so. A  $T_2$ -system is the first one that is able to learn on its own to control the environment. In other words, while a  $T_1$ -system controls only the surrounding world, a  $T_2$ -system controls also itself. Thus, a  $T_2$ -system can be understood as being capable of *inducing cybernetic knowledge*. It learns how to monitor and act. The process underlying the lower traverse induces the rules that drive the deductions of the higher traverse. For example, a  $T_2$ -system equipped with a thermometer, a heating pad, a few other components and appropriate learning rules may be able to invent a thermostat and by doing so, extract cybernetic

knowledge on how to maintain the environmental temperature constant. In that example, the invention process is the supervisor of the thermostat.

In biology, many examples of  $T_2$ -supervision can be found. Gene expression mechanisms play the ultimate supervisory role within an organism. The homeostatic function that any organ performs, or the regulation machinery responsible for a reflex, or the feedback loop involved in the response of the immune system—all need to be supervised. Someone has to make sure that they work properly, and make adjustment when necessary. In biological systems, this supervisory role can be traced back to gene expression mechanisms.

Therefore, to keep one variable constant in an unpredictable world, the control mechanism for that variable has to adjust, which means changing some other variables in the system by operations performed by the supervisory systems. In other words, in  $T_2$ -systems, lower-level traverses have the capability of inducing *allostasis* (Sterling & Eyer 1988; Sterling 2004; Karatsoreos & McEwen 2011): maintaining constancy at one place in the system by making the necessary changes at another place in the system. For example, in a case of dehydration, extensive physiological changes are needed in order to maintain the most critical internal water concentrations in the working range. Urine output is reduced. Veins and the arteries are constricted to maintain blood pressure with less fluid. The tongue and the mouth dry up.

Whereas a minimum of  $T_1$ -adaptability is needed for Bernard's (1974) *milieu intérieur* and homeostasis (Cannon 1932), a minimum of  $T_2$ -adaptive capacities is needed for a system to be able to perform allostasis (Sterling & Eyer 1988; Sterling 2004; Karatsoreos & McEwen 2011). Thus, although allostatic systems are built solely from homeostatic mechanisms (Day 2005), allostasis reflects an increased level of system organization (i.e.,  $T_2$  is build from  $T_1$ -components).

### 3.3.1 Neural networks and $T_2$

Supervision i.e., knowledge induction, is also important for organizing neural networks. In the nervous system, plasticity mechanisms play the supervisory role for establishing the anatomy of the system, which in turn determines how the sensory-motor loops operate. Plasticity mechanisms mediate growth of axons and

dendrites, formation of synapses and neuronal excitability.

Activity-dependent plasticity is responsible for the development of a nervous system and for its maintenance later (Dubner & Ruda 1992; Ganguly & Poo 2013). A minimum of  $T_2$ -structure is needed to allostatically change the anatomy (synaptic weights in the mildest form) in order to maintain behavioral functionality of the system as a whole. A recovery after an injury, such as a stroke, also could not occur without a  $T_2$ -structure and thus, without feedback obtained through exercise. Failure to successfully function at the higher traverse i.e., at the sensory-motor functions of the neural network, induces downward pressure for adjustment by actions of the lower traverse.

While some of the lower-traverse plasticity mechanisms may simply be keeping a neuron within its optimal operational range, such as the up-regulation of excitability following a period of quiescence (Mozzachiodi & Byrne 2010; Hansel et al. 2001; Turrigiano 2012), others may have a more general adaptive function related to the neuron's function in goal-oriented behavior (Buonomano & Merzenich 1998; Draganski et al. 2004; Xu et al. 2009). For example, the reward systems based on dopamine signaling (Wise 1996), can inform a cell whether to make changes in order to produce a more adaptive form of behavior in the future (note that Hebbian learning alone is generally not sufficient to provide an additional traverse<sup>20</sup>).

The higher traverse of a neural system involves de- and hyperpolarization of neural membranes, generation and delivery of action potentials, and synaptic transmission. Here, cybernetic knowledge created by the plasticity mechanisms and stored at the level of anatomical properties of a neuron is used to extract more specific knowledge in the form of the current activity of that neuron. This highest level of organization involves both physiological and behavioral phenomena. Physiological phenomena at that top level are firing rates, inhibition, excitation, neural synchrony, oscillatory activity, etc. Behavioral phenomena are manifested as simple reflexes but also as more elaborated forms of closed sensory-motor loops—such as the willful conscious behavior.

An example of a  $T_2$ -system that establishes proper connectivity in a network is illustrated in Figure 3. To obtain feedback from the environment at its lowest level of organization, a neuron may monitor the efficiency of its outputs in controlling its own inputs. The

presumed rule strengthens connections if the output of a neuron has the power to mute its inputs (Figure 3A) and weakens connections otherwise (Figure 3B). In the most extreme case, the neuron may completely remove a connection defined as un-functional by those rules and seek to create a new one (Figure 3C). These rules grant adaptive capabilities to the system. The rule may be used to establish the network connectivity at first but can also be used later if the environment changes those relationships and the neuron's connectivity needs to be adjusted again. This grants considerable adaptive capabilities to the system. For example, if a reflex is not working efficiently due to muscle fatigue, such a rule can be used to crank up the efficiency of a synapse involved in that reflex—resulting in an improved overall functionality.<sup>21</sup> In man-made devices,  $T_2$  allostatic systems are rare and rudimentary<sup>22</sup>.

$T_2$ -structure helps a system operating in a changing, unpredictable environment in which no preconceived plans can be executed without an occasional need for adjustments to new circumstances, and no rules of behavior can be applied for long time without the need for adapting them according to the altered properties of the world. The system monitors indicators of successes/failures of the executed actions and modifies its own properties according to more general knowledge of which adjustments should be made, and how.

The limitation of a  $T_2$ -system is that it can learn efficiently either to deal with an environment in general or with a specific situation in which it finds itself, but it has difficulties learning both, the general and the specific knowledge. If the system learns to behave in one type of situation, it has hard time behaving in another situation, and finds itself in a need to forget the old knowledge in order to acquire new knowledge. This transition from situation to situation is related to stability plasticity dilemma<sup>23</sup> and is costly both in learning time and in the adaptability that the system can exhibit.

### 3.4 A $T_3$ -system: anapoiesis and abduction

To the same degree to which  $T_1$  has more adaptability than  $T_0$ , or  $T_2$  than  $T_1$ , a  $T_3$ -system has a qualitatively higher level of adaptability than a  $T_2$ -system. This system can be seen as a higher-order supervisor—or supervision of a supervisor, which, when combined with high variety, gives it unique adaptive capabilities.

The adaptive advantages of a  $T_3$ -system stem from its expanded capabilities for acquisition and storage of cybernetic knowledge at two different levels of generality. A  $T_3$ -system has in total four levels of organization, which can be referred to as *top-3*, *top-2*, *top-1* and *top*. This provides the system with two levels of organization at which it can change its own structure (*top-1* and *top-2*) i.e., at which it can learn (Figure 4).

The most obvious advantage is more detailed coverage of the generality-specificity continuum of knowledge of the surrounding world's properties. However, there is a qualitative leap in the adaptability that comes from this additional traverse when variety is high at each level of organization. The system can juggle much knowledge internally from a general to a specific level and back. With a minimal hint from the environment on what is about to come, a previously acquired knowledge about the upcoming activities can be pulled out from the general level and poietically instilled at a more specific level.

As a consequence, a  $T_3$ -system is not only capable of learning how to control but it can also learn how to learn quickly. The mentioned slow adaptation process may turn into a process as quick as what it takes to recognize a pattern. This is made possible by the intermediate traverse out of the total of three traverses that the system possesses (Figure 4A). This is the traverse in a sandwich i.e., whose both ends meet other traverses: Its lower-end knowledge is not fixed but can be changed; Its higher end-knowledge is not an output but is still a part of the system. The consequence is that this middle traverse can give the system unprecedented level of adaptability, which, with sufficient variety, leads to nothing short of the ability to think.

The middle traverse can be understood as *reconstructing knowledge* at *top-1* that has been extracted once but lost since. In  $T_3$ -systems, the knowledge at *top-1* can be treated as temporary but more permanent version is stored at *top-2*, which is also a more general (abstract) form. This generalized knowledge is stored by the learning rules at *top-3* (Figure 4B). Then, when needed, *top-1* knowledge can be reconstructed from *top-2* by a relatively brief interaction with the environment. Ultimately, it is *top-1* that controls behavior directly, but it is the general knowledge at *top-2* that does the control in the background because it enables flexible exchange of the contents at *top-1*. Thus, with each change

in the general properties of the environment, the system may not need to relearn everything from scratch and extract cybernetic knowledge from the environment again, as a  $T_2$ -system would need to do. Instead, given that the traces of previous encounters with similar situations have been stored at two levels below, the knowledge can be brought back up now quickly.<sup>24</sup>

That way, a familiar situation i.e., a set of environmental properties, needs to be detected to initiate reconstruction, but the details associated with that situation not be learned all over again. Many of the details are already pre-stored and can be easily “pulled out” in a given situation or context. Thus, a  $T_3$ -system system can also be understood as implementing *situation- or context-dependent supervision*.

This reconstructive traverse from the *top-2* to the *top-1* organization level is referred to as *anapoiesis*, from Ancient Greek ανά (ana) meaning “over, again”. The term refers to the repeated creation of knowledge through reconstruction from a general depository to a more specific form.

Anapoiesis is an additional intermediate generator of variety at *top-1*. It is triggered whenever the environment significantly changes and downward pressure for adjustment is exerted onto the monitor-and-act units at the level *top-2*. If no significant pressure has been exerted at *top-3* and if the system eventually succeeds in removing the adjustment pressure by relying on *top-2* / *top-1* only, then a relatively easy solution to the problem has been reached. The system has successfully reconstructed knowledge from its past experiences and used anapoietic reconstruction to guide its behavior in a given situation.

In contrast, if the downward pressure for adjustment reaches all the way to the bottom and thus, the monitor-and-act units at the level *top-3* are informed of a need to make changes, anapoiesis alone has likely not been sufficient to satisfy the needs of the system. A new, unfamiliar situation is encountered! In that case, a  $T_3$ -system adapts by deploying its unique capability to make changes to the general knowledge driving anapoiesis—creating new knowledge at the level *top-2* for a new type of situation. Thus, the full dynamics of the practopoietic cycle of causation in a  $T_3$ -system includes anapoiesis as the middle traverse (from organization level *top-2* to *top-1*) but also the verification process, which necessarily engages the top traverse (from *top-1* to *top*), and the

adjustment of the general knowledge (from *top* to *top-2*), which is engaged whenever anapoiesis fails. This describes the full global workspace (Baars 2005) of a  $T_3$ -system. An example of anapoiesis is the creation of phenotype from genotype<sup>25</sup>. In artificial neural networks, anapoiesis may provide a general solution to the problem of the stability-plasticity dilemma, as it enables dealing with both general and specific knowledge<sup>26</sup>.

*An example: Applying rules vs. learning them.* An adaptive system changes the rules of behavior given a change in situation. In a  $T_3$ -system this is done at two different levels: At one level the already known, previously used, rules are being reactivated. This level employs anapoiesis. At the other, lower level novel rules are being extracted.

A toy example of rule reactivation and extraction is a *Wisconsin card-sorting test* used in clinical assessment of executive functions (Berg 1948). In this test a participant sorts cards from a deck to match one of the properties of the reference cards placed in front of the participant. The deck and the reference cards should be matched either in color, shape or the number of items. Importantly, the participant is never told explicitly which property needs to be matched and is only given feedback in form of “correct” or “wrong”. In addition, the sorting rules unexpectedly change during the task and the only indicator of a change is the feedback “wrong”. The participant’s task is to find out the new rule.

This test applies matching rules that are intuitive (e.g., matching red color with another red color) and thus, in a way, already known to the participant. For that reason, the problem can be understood as engaging a  $T_2$ -system: An anapoiesis-like process activates one of the rules at the time (at *top-1*) from the repertoire of the known rules (stored at *top-2*). Thus, no induction of novel rules is necessary and hence, no traverse that operates below *top-2* seems to be involved.

Neural networks implementing such pre-existing rules have been created and demonstrated to mimic human performance (Levine & Prueitt 1989; Dehaene & Changeux 1991; Parks et al. 1992; Carter 2000; Kaplan et al. 2006). In these systems, the *top-2* knowledge has been either hand-coded (e.g., Dehaene & Changeux 1991) or pre-trained (e.g., Carter 2000)—in either case acquisition of those rules



requiring an intervention from a side of a human programmer.

However, one can envision an extended version of Wisconsin card-sorting test that requires the system to extract those rules because they are not intuitive and already learned. There are many rules possible that are not so intuitive. For example, the green reference may have to be matched to a red deck card; or the count of three items to a square shape, etc.

So, what if the test is made suddenly in such a way to be more difficult and not to rely on the most intuitive types of associations? The number of potential rules becomes too large to be hand-coded or pre-wired—thus, more like a real-life situation. The learning time becomes longer and a number of errors becomes larger. In that case a full  $T_3$ -system is required to explore the space of possibilities—largely by trial and error—and eventually to acquire new *top-2* knowledge. The system has to use the feedback to make changes at *top-2* level iteratively. But upon successful learning, the system can operate again quickly through anapoiotic reconstruction from *top-2* to *top-1*.

### 3.4.1 Peristasis

The adaptive capabilities of a  $T_3$ -system can also be understood from the perspective of regulating system variables key for survival, or homeostasis (Cannon 1932; Bernard 1974), and the distinction between homeostasis and allostasis (Sterling & Eyer 1988; Sterling 2004; Karatsoreos & McEwen 2011). A  $T_3$ -system has adaptive capabilities that exceed those of allostasis. The bottom traverse can adjust a  $T_3$ -system to its habitat such that it can perform allostasis more efficiently—i.e., fast reconstruction means less allostatic load (McEwen & Stellar 1993). If the organism is exposed to extreme allostatic pressure e.g., hot or cold, a  $T_3$ -system is able to adjust such that allostatic pressure is reduced, by e.g. growing fur, and thus a smoother physiological operation is ensured: The knowledge at *top-3* is used to reconstruct properties of the system at a higher level of organization. This adjustment reflects a more elaborate form of adaptation to the surrounding world than allostasis i.e., a higher level of organization, and can be referred to as *peristasis*, from Ancient Greek word περί (peri) meaning “around”. Peristasis refers to “staying stable by understanding (or grasping) the conditions for adaptation that apply to the current situation”. In our extended, more

difficult version of Wisconsin card-sorting test, peristasis would be achieved by the acquisition of a new set of rules. That way, by activating one of them, a  $T_3$ -system keeping stable the most important variable of that task: the feedback “correct”.

### 3.4.2 Abduction

Much like  $T_1$ - and  $T_2$ -systems perform cybernetic operations that correspond, respectively, to logical deduction and induction, there is also a logical-like operation that signifies operations of a  $T_3$ -system. Anapoiotic reconstruction of a  $T_3$ -system can be described as a use of past knowledge to guess which knowledge is correct for the given situation and then evaluating the degree to which the guess matches reality, and adjusting the discrepancies that may appear. The corresponding guess-based logical operation is known as *abduction*, introduced to account for the inferences made on the basis of the best hypothesis given the available knowledge (Peirce 1903). Abduction involves validation and correction of the guess, which requires iteration of the abducting steps. A  $T_3$ -system makes a guess through the anapoiotic reconstruction of knowledge and validates it by interacting further with the environment. If the guess turns incorrect, adjustment is needed. This indicates then a need to equip the system with new knowledge for abductions, which in turn requires learning by applying the lowest of the three traverses. For example, in our extended Wisconsin card-sorting test, the simple intuitive rules may be abduced first, but then rejected in light of the feedback. Another rule may be abduced next, tested, rejected, etc. In a probabilistic form, abduction is described by Bayes’ theorem, which has been argued to be relevant for brain operations (Friston 2010; Shipp et al. 2013; Friston et al. 2012; Clark 2013). Thus, Bayesian inferences enter practopoietic systems through anapoiotic reconstruction.

## 4. Discussion

Much of the biological knowledge and skills can be stored in a form of cybernetic variety, but it is only the levels of organization that brings about the capacity to acquire knowledge. Practopoietic theory proposes that these levels of organization are achieved through traverses:

The acquisition takes place always from general cybernetic knowledge to specific.

The implication is that, to achieve intelligence, a system needs not only variety in a form of e.g., network connectivity, hardware components, if-then statements, etc., but also a feedback from environment through which the variety is being adjusted. The key contribution of practopoietic theory is the generalization of the role of feedback: In any given system, the principles by which the variety is adjusted can be also adjusted themselves by yet another set of principles, and so on. And each set of principles can have its own variety. This generalization results in a hierarchy that can in principle grow indefinitely. Each step in this hierarchy is one traverse of cybernetic knowledge.

The implication is that variety and traverses should be considered as somewhat orthogonal in contributing towards the total intelligence of the system: Variety is about knowing what to do; Traverses are about acquiring this knowledge. Both components are essential and neither alone can provide powerful intelligence. Thus, no matter how much variety one may add to a system e.g., in a form of neurons and connections, the system may still not be able to produce human-like mental capabilities if it does not have enough traverses.

Practopoietic theory allows us to analyze the adaptive competences of systems with differing numbers of traverses. These competences range from simple information storage at  $T_0$  (no traverses) and deductions from this information at  $T_1$ , up to induction of cybernetic knowledge at  $T_2$ , and abduction at  $T_3$  (i.e., three traverses). The properties of different systems are summarized in Table 1.

A conclusion is that a  $T_1$ -system cannot possibly have enough variety to deal with the combinatorial explosion of the real-life situations of a human person. A  $T_2$ -system does not solve this problem satisfactorily either, as it requires forgetting old knowledge when learning new one. But a  $T_3$ -system appears to have enough flexibility to deal with the richness of a real life. This system can change itself on two levels: it can learn abstract rules and reconstruct from them concrete ones in a particular situation. A  $T_3$ -system takes also advantage of the fact that with more adaptability levels the system can be smaller in total size and yet, produce the same or higher amount of variety than systems with fewer such levels.

Further analysis of the unique properties of  $T_3$ -systems indicated that what is particularly missing in our brain theories, and also in our technology of AI algorithms (Kurzweil 2005), is the middle traverse of those systems—referred to as anapoiesis. Thus, to address the mind-body problem successfully (Descartes 1983/1644; Popper 1999; Chalmers 1999; Rust 2009), practopoietic theory suggests that it is necessary to consider  $T_3$ -systems with enough variety to foster powerful anapoiesis.

Much of what we know about human cognition supports the idea our minds are  $T_3$ -machines relying heavily on anapoiesis:

*Reconstructive memory:* There is evidence that recall from human memory is reconstructive by its nature (Schacter et al. 2000; Squire 1992; Burgess 1996), and that working memory capacity is directly determined by reconstructive capabilities by a process known as chunking (Miller 1956; Cowan 2001)<sup>27</sup>. Thus, both of these phenomena may fundamentally rely on anapoietic reconstruction from general to specific knowledge. Similarly, past stimulation builds expectancies for later stimulus processing (Albright & Stoner 2002; Nikolić 2010). These context-induced expectancies possibly require anapoietic processes too: Expectations may be produced by adjustments at the level *top-1* and using the knowledge acquired previously at *top-2*.

Efficient management of expectancies is highly adaptive. As an animal is behaving, it needs to activate slightly different situational knowledge on momentary basis. Every new situation that it enters requires different knowledge on what can be expected to happen and what may need to be done. For example, as a hedgehog leaves shelter, enters open space, moves into woods, detects food, etc., each situation implies different expectancies. These situations can exchange literally every few steps of a walk. It is more efficient to reactivate existing knowledge in a form of working memory contents and expectancies than to re-learn it from scratch.

*Downward pressure:* Evidence indicates that the degree to which these working memory and expectancy mechanisms are engaged depends on downward pressure for adjustment. Slow, capacity-limited working memory resources, or controlled processes, are engaged typically when difficulties arise using quick and capacity-ample automatic processes (Shiffrin & Schneider 1977; Stanowich & West 2000; Kahneman 2003, 2011). This suggests that the strength of the downward pressure for adjustment plays a role

in activating anapoietic mechanisms. This pressure is particularly extensive when the organism encounters novel situations to which it yet has to find suitable knowledge at *top-1*.<sup>28</sup>

Similarly, evidence indicates that explicit long-term memories are facilitated by downward pressure for adjustment exerted from the contents of working-memory. Memories for verbal materials are good when their relation to a certain context is processed i.e., when the contents are crunched intensively by working memory. In contrast, the memory is poor when only sensory aspects are processed ( Craik & Lockhart 1972). Similarly, in vision, long-term memory for visual patterns improves linearly with the time the patterns are processed in visual working-memory (Nikolić and Singer 2007). These results can be interpreted as downward pressure for adjustment exerted by anapoietic operations on *top-3* mechanisms to form novel long-term memory at *top-2* level.

*Concepts:* The capability of the human mind to conceptualize the world (Barsalou et al. 2003; Gallese & Lakoff 2005) may be accounted for by anapoiesis of knowledge too. Our conceptual knowledge, stored in long-term memory, consists of generalized, abstract rules of interacting with the world (e.g., Barsalou et al. 2003). Hence, to apply this knowledge to a specific case, there is always a need for a matching operation: general principles should be matched to a specific situation. This is where anapoiesis comes to aid: When an object is encountered, it may be categorized by matching the generalized knowledge at *top-2* to the sensory inputs coming from *top*. The result is knowledge constructed at *top-1* that is specific to that object. Only then can the system interact with that object successfully. For example, thanks to the anapoiesis of concepts we may be able to drive a car and avoid collisions in novel traffic situations that never occurred before; General driving rules are applied to each specific situation.

*Ambiguities and problem solving:* Human minds are distinguished from machines largely for their ability to resolve ambiguities (e.g., Kleinschmidt et al. 1998) and cognitive problems in general (Sternberg & Davidson 1995; Jung-Beeman et al. 2004). Anapoietic reconstruction may be the key behind those intellectual capabilities. Natural to a  $T_3$ -system is a reiteration of anapoiesis in case that the first round was not successful in removing the pressure for adjustment. In case of failure, the pressure remains and thus, the need to continue

with anapoiesis remains too. With each subsequent anapoietic iteration chances to find a solution may improve due to the work done by the preceding anapoietic steps. Although they failed, they may have brought the system closer to the solution than it was before. An important part of that is the adjustment pressure that is, due to the failures of anapoiesis, exerted on the lower level i.e., long-term memory.

This dynamics of failure and pressure may underlie the process of abduction. For example, in an ambiguous situation (Is this a predator or a prey? A friend or a foe?), a  $T_3$ -system may first abduce a hypothesis, and by doing so, drive the actions of the sensory-motor system towards obtaining further sensory inputs to test that hypothesis (e.g., by directing gaze). The hypothesis may be then confirmed or rejected. If rejected, abduction of a new hypothesis may require concurrent changes at *top-2* consistent with the knowledge that the first hypothesis was incorrect. The process may then continue. This iterative dynamics of resolving ambiguities, from *top* to *top-2*, can eventually produce cybernetic knowledge at level *top-1* that is sufficiently original and different from anything in the past, so that it can qualify as an insight or a creative solution to a problem.

*Anapoietic cognition:* In general, a property of the intermediate anapoietic traverse, laying in the sandwich between sensory-motor loops and plasticity, is that it allows for reorganization of knowledge without immediately executing behavior. That is, anapoiesis may not act immediately towards the main goal—i.e., towards resolving the main downward pressure for adjustment. Instead anapoiesis may act first towards sub-goals—postponing the main behavioral actions until the conditions for actions are ready. These sub-goals may involve behaviorally covert operations, which, when becoming elaborate, may manifest themselves as cognition.

Thus, we may hypothesize more generally that our entire cognition is based largely on anapoiesis: An arrival at a Gestalt of a percept (Köhler 1929), attention successfully directed (Treisman 1980; Posner & Petersen 1990),<sup>29</sup> stimulus recognized (Furmanski & Engel 2000), object mentally rotated (Kosslyn et al. 1998), a logical conclusion inferred (Clark 1969), a decision reached (Bellman & Zadeh 1970), a problem solved (Sternberg & Davidson 1995; Jung-Beeman et al. 2004)—may all be end-results of anapoiesis. In cognitive science, the outcomes of these activities are operationalized

as working memory contents, focus of attention, recall, imagination, expectancies, biases, accumulation of evidence, etc. In practopoietic theory, these resulting mental contents can be referred to collectively as cybernetic knowledge at *top-1* level of organization.

*Awareness:* Anapoietic process may also account for the capability of biological systems to be aware of the surrounding world. Anapoiesis, has never a full internal “peace” of uninterrupted operation like e.g., a computer algorithm would have when factoring a large number. Instead, anapoietic process is continually bombarded by downward pressure for adjustment as a result of an unceasing influx of sensory inputs. Anapoietic process has to integrate all the inputs in its equi-level interactions, and this results in a form of continuous peristasis—i.e., perpetually adjusted knowledge of what is currently out there in the surroundings, even if it is irrelevant for the current task.

That way the system satisfies Ashby’s good regulator theorem for the current environment. The great adaptive advantage is that this knowledge can be used immediately if the distractor becomes suddenly relevant for the task, or relevant in any other way. For example, while hunting, an animal may have to integrate irrelevant auditory inputs such as the sounds of a water stream. But this very integration enables detecting effectively changes in that sound, which may then be essential for survival and they may indicate e.g., the presence of a predator. Thus, eventually, the inability to switch off and the necessity to integrate may lead to particularly adaptive behavior: Stopping the hunting and seeking shelter. Thus, due to the equi-level interactions across the monitor-and-act units of anapoiesis the knowledge is organized at the level *top-1* such as to take into account everything that enters through senses, not only information related to the current task. That way, the system becomes aware of its surrounding world.

*AI and understanding:* The difference between  $T_3$ - and  $T_1$ -systems may be the difference between what Searle (1980; 2009) referred to as understanding on one hand, and the input-output mapping programmed into computer algorithms on the other hand. In his Chinese Room argument, Searle asserts that computer algorithms, that are being programmed and thus provided the knowledge from the outside,

cannot understand what they are doing. Hence, such algorithms cannot think, and thus cannot provide strong AI.<sup>30</sup> Practopoietic theory explains what these algorithms are missing: Such an algorithm is a  $T_1$ -system, while understanding with all the conceptualizations requires a  $T_3$ -system that possesses rich cybernetic knowledge at the level *top-2*.

Hence, practopoietic theory prescribes that strong AI can be created only with multi-level interactions with its environment based on a  $T_3$ -system architecture. This requires the system to acquire general knowledge stored at level *top-2* on its own, without hard coding. During operations parts of this knowledge then need to be reconstructed at the level *top-1*. The challenge is then to endow artificial systems with the needed seed-knowledge i.e., the most general learning mechanisms at the level *top-3*, that are suitable for acquiring the needed knowledge at *top-2*. Only then can the system achieve mind-like operations that activate a more specific form of that knowledge at *top-1*, which then in turn enables the system to exhibit intelligent overt adaptive behavior at *top*.

## 5. Conclusions

In conclusion, adaptive intelligence requires not only massive storage of knowledge in a form of a rich network architecture but also a sufficient number of adaptive levels to acquire, adjust and manipulate that knowledge. Our brain theories, empirical investigations, and AI algorithms should consider anapoiesis as an adaptive component necessary to explain human mind and achieve its mental capabilities.

## Acknowledgments

The author would like to thank Shan Yu, Matej Pavlić, Viola Priesemann, Raul C. Muresan, David Eriksson and Kleopatra Kouroupaki for valuable discussions and comments and Wolf Singer for support. This work was supported by Hertie-Stiftung and Deutsche Forschungsgemeinschaft.



## References

- Abraham, W. C. & Bear, M. F. (1996) Metaplasticity: the plasticity of synaptic plasticity. *Trends in Neurosciences* 19(4): 126-130.
- Ahima, R. S. & Flier, J. S. (2000) Adipose tissue as an endocrine organ. *Trends in Endocrinology & Metabolism* 11(8): 327-332.
- Albright, T. D. & Stoner, G. R. (2002) Contextual influences on visual processing. *Annual Review of Neuroscience* 25(1): 339-379.
- Alvarez, G. A. & Cavanagh, P. (2004) The capacity of visual short-term memory is set both by visual information load and by number of objects. *Psychological Science* 15(2): 106-111.
- Ashby, W.R. (1956) *An Introduction to Cybernetics*. Chapman & Hall, 1956, ISBN 0-416-68300-2
- Awh, E. & Jonides, J. (2001) Overlapping mechanisms of attention and spatial working memory. *Trends in Cognitive Sciences* 5(3): 119-126.
- Baars, B. J. (2005) Global workspace theory of consciousness: toward a cognitive neuroscience of human experience. *Progress in Brain Research* 150: 45-53.
- Baddeley, A. D. (1993) *Working memory or working attention?* Clarendon Press/Oxford University Press.
- Barsalou, L. W., Kyle Simmons, W., Barbey, A. K. & Wilson, C. D. (2003) Grounding conceptual knowledge in modality-specific systems. *Trends in Cognitive Sciences* 7(2): 84-91.
- Bateson, P. (2004) The active role of behaviour in evolution. *Biology and Philosophy* 19(2): 283-298.
- Baum, E. B. (2004) *What is thought?* The MIT Press.
- Bedau, M. (2002) Downward causation and the autonomy of weak emergence. *Principia: An International Journal of Epistemology* 6(1): 5-50.
- Beer, S. (1974) *Designing Freedom*. CBC Learning Systems, Toronto; and John Wiley, London and New York.
- Beer, S. (1979) *The Heart of Enterprise*. John Wiley, London and New York. Reprinted with corrections 1988.
- Bellman, R. E. & Zadeh, L. A. (1970) Decision-making in a fuzzy environment. *Management Science* 17(4): B-141.
- Berg, E. A. (1948) A simple objective technique for measuring flexibility in thinking. *The Journal of General Psychology* 39(1): 15-22.
- Bernard, C. (1974) *Lectures on the phenomena common to animals and plants*. Trans Hoff HE, Guillemin R, Guillemin L, Springfield (IL): Charles C Thomas ISBN 978-0-398-02857-2.
- Bernstein, N. (1967) *Coordination and regulation of movements*. New York: Pergamon Press.
- Bi, G. Q. & Poo, M. M. (1998). Synaptic modifications in cultured hippocampal neurons: dependence on spike timing, synaptic strength, and postsynaptic cell type. *The Journal of Neuroscience* 18(24): 10464-10472.
- Brooks, R. A. (1991) Intelligence Without Representations. *Artificial Intelligence Journal* 47: 139-159.
- Brooks, R. A. (1999) *Cambrian Intelligence: The Early History of the New AI*. Cambridge MA: The MIT Press. ISBN 0-262-52263-2
- Buonomano, D. V. & Merzenich, M. M. (1998) Cortical plasticity: from synapses to maps. *Annual Review of Neuroscience* 21(1): 149-186.
- Burgess, P. W. (1996) Confabulation and the control of recollection. *Memory* 4(4): 359-412.
- Campbell, D. T. (1990) Levels of organization, downward causation, and the selection-theory approach to evolutionary epistemology.
- Cannon, W. B. (1932) *The wisdom of the body*.
- Carter, J. R. (2000) *Facial expression analysis in schizophrenia*. Unpublished doctoral dissertation. University of Western Ontario.
- Chalmers, D. (1996) *The Conscious Mind: In Search of a Fundamental Theory*, New York and Oxford: Oxford University Press. Hardcover: ISBN 0-19-511789-1, paperback: ISBN 0-19-510553-2
- Clark, A. (2013) Whatever next? Predictive brains, situated agents, and the future of cognitive science. *Behavioral and Brain Sciences* 36(03): 181-204.
- Clark, H. H. (1969) Linguistic processes in deductive reasoning. *Psychological Review* 76(4): 387.
- Conant, R. C. & W. Ashby, R. (1970) Every good regulator of a system must be a model of that system. *International Journal of Systems Science* 1(2):89-97.
- Cowan, N. (2001) The magical number 4 in short-term memory: A reconsideration of mental storage capacity. *Behavioral and Brain Sciences* 24(1): 87-114.
- Craik, F. I. & Lockhart, R. S. (1972) Levels of processing: A framework for memory search. *Journal of Verbal Learning and Verbal Behavior* 11(6): 671-684.
- Damasio, A. (1999) *The Feeling of What Happens: Body and Emotion in the Making of Consciousness*. New York: Houghton Mifflin Harcourt. ISBN 0-15-601075-5
- Darwin, C. (1859/2009) *The origin of species by means of natural selection: or, the preservation of favored races in the struggle for life*. W. F. Bynum (Ed.). AL Burt.
- Dawkins, R. (1999) *The extended phenotype: The long reach of the gene*. Oxford University Press.
- Dawkins, R. (2004) Extended phenotype—but not too extended. A reply to Laland, Turner and Jablonka. *Biology and Philosophy* 19(3): 377-396.
- Day, T. A. (2005) Defining stress as a prelude to mapping its neurocircuitry: no help from allostasis. *Progress in Neuro-Psychopharmacology and Biological Psychiatry* 29(8): 1195-1200.
- Dehaene, S. & Changeux, J. P. (1991) The Wisconsin Card Sorting Test: Theoretical analysis and modeling in a neuronal network. *Cerebral Cortex* 1(1): 62-79.
- Descartes, R. (1983) *Principia philosophiae (Principles of Philosophy)*. Translation with explanatory notes by Valentine Rodger and Reese P. Miller (Reprint ed.). [1644, with additional material from the French translation of 1647]. Dordrecht: Reidel. ISBN 90-277-1451-7.

- Di Paolo, E. & De Jaegher, H. (2012) The Interactive Brain Hypothesis, *Frontiers in Human Neuroscience* 6: 163. <http://dx.doi.org/10.3389/fnhum.2012.00163>
- Draganski, B., Gaser, C., Busch, V., Schuierer, G., Bogdahn, U. & May, A. (2004) Neuroplasticity: changes in grey matter induced by training. *Nature* 427(6972): 311-312.
- Dubner, R. & Ruda, M. A. (1992) Activity-dependent neuronal plasticity following tissue injury and inflammation. *Trends in Neurosciences* 15(3): 96-103.
- Furmanski, C. S. & Engel, S. A. (2000) Perceptual learning in object recognition: Object specificity and size invariance. *Vision Research* 40(5): 473-484.
- Freud, S. (1915/2005) *The unconscious*. (G Frankland, Trans.) Penguin, London.
- Fris, R. J. (2004) Preoperative low energy diet diminishes liver size. *Obesity Surgery* 14(9): 1165-1170.
- Friston, K. (2010) The free-energy principle: a unified brain theory? *Nature Review Neuroscience* 11 (2): 127-38.
- Friston, K., Adams, R. A., Perrinet, L. & Breakspear, M. (2012) Perceptions as hypotheses: saccades as experiments. *Frontiers in Psychology* 3.
- Gallese, V. & Lakoff, G. (2005) The brain's concepts: The role of the sensory-motor system in conceptual knowledge. *Cognitive Neuropsychology* 22(3-4): 455-479.
- Ganguly, K. & Poo, M. M. (2013) Activity-Dependent Neural Plasticity from Bench to Bedside. *Neuron* 80(3): 729-741.
- Gibson, J. J. (1979) *The Ecological Approach to Visual Perception*, ISBN 0-89859-959-8.
- Gibson, J. J. (1977) *The Theory of Affordances*. In *Perceiving, Acting, and Knowing*, edited by Robert Shaw and John Bransford, ISBN 0-470-99014-7.
- Giovannoni, S. J., H. James Tripp et al. (2005) Genome Streamlining in a Cosmopolitan Oceanic Bacterium. *Science* 309 (5738): 1242-1245. doi:10.1126/science.1114057. PMID 16109880.
- Glanville, R. (2002) Second order cybernetics. *Encyclopaedia of Life Support Systems*.
- Gollnick, P., Babitzke, P., Antson, A. & Yanofsky, C. (2005) Complexity in regulation of tryptophan biosynthesis in *Bacillus subtilis*. *Annual Review Genetics* 39: 47-68.
- Grossberg, S. (1987) Competitive learning: From interactive activation to adaptive resonance. *Cognitive Science* 11(1): 23-63.
- Gurfinkel, V. S., Lipshits, M. I. & Popov, K. E. (1974) Is the stretch reflex a basic mechanism in the system of regulation of human vertical posture?. *Biofizika* 19(4): 744.
- Hansel, C., Linden, D. J. & D'Angelo, E. (2001) Beyond parallel fiber LTD: the diversity of synaptic and non-synaptic plasticity in the cerebellum. *Nature Neuroscience* 4(5): 467-475.
- Hasher, L. & Zacks, R. T. (1979) Automatic and effortful processes in memory. *Journal of Experimental Psychology: General* 108: 356-388.
- Hebb, D. O. (2002) *The organization of behavior: A neuropsychological theory*. Psychology Press.
- Heylighen, F. & Joslyn, C. (2001) Cybernetics and second order cybernetics. *Encyclopedia of physical science & technology* 4: 155-170.
- Holt, E. B. (1914) *The concept of consciousness*. New York: Macmillan.
- Hubel, D. H. & Wiesel, T. N. (1962) Receptive fields, binocular interaction and functional architecture in the cat's visual cortex. *The Journal of Physiology* 160(1): 106.
- James, W. (1890) *The principles of psychology*. Henry Holt and Co., New York.
- Johanssen, W. (1911) The genotype conception of heredity. *The American Naturalist* 45(531): 129-59. <http://www.jstor.org/stable/2455747>
- Julesz, B. (1984) A brief outline of the texton theory of human vision. *Trends in Neurosciences* 7(2): 41-45.
- Jung-Beeman, M., Bowden, E. M., Haberman, J., Frymiare, J. L., Arambel-Liu, S., Greenblatt, R., ... & Kounios, J. (2004) Neural activity when people solve verbal problems with insight. *PLoS Biology* 2(4): e97.
- Kahneman, D. (2003) A perspective on judgement and choice. *American Psychologist* 58: 697-720.
- Kahneman, D. (2011) *Thinking, Fast and Slow*. Macmillan. ISBN 978-1-4299-6935-2.
- Kant, I., Guyer, P. & Wood, A. W. (Eds.). (1998) *Critique of pure reason*. Cambridge University Press.
- Kaplan, G. B., Şengör, N. S., Gürvit, H., Genç, İ. & Güzelış, C. (2006) A composite neural network model for perseveration and distractibility in the Wisconsin card sorting test. *Neural Networks* 19(4): 375-387.
- Karatsoreos, I. N. & McEwen, B. S. (2011) Psychobiological allostasis: resistance, resilience and vulnerability. *Trends in Cognitive Sciences* 15(12): 576-584.
- Kirschner, M. & Gerhart, J. (1998) Evolvability. *Proceedings of the National Academy of Sciences of the United States of America* 95 (15): 8420-8427.
- Kleinschmidt, A., Büchel, C., Zeki, S. & Frackowiak, R. S. J. (1998) Human brain activity during spontaneously reversing perception of ambiguous figures. *Proceedings of the Royal Society of London. Series B: Biological Sciences* 265(1413): 2427-2433.
- Köhler, W. (1929) *Gestalt psychology*.
- Kosslyn, S. M., Digirolamo, G. J., Thompson, W. L. & Alpert, N. M. (1998) Mental rotation of objects versus hands: neural mechanisms revealed by positron emission tomography. *Psychophysiology* 35(2): 151-161.
- Kurzweil, R. (2005) *The singularity is near: When humans transcend biology*. Penguin. com.
- Lakoff, G. & Johnson, M. (1980) *Metaphors We Live By*. University of Chicago Press. ISBN 0-226-46801-1
- Levine, D. S. & Prueitt, P. S. (1989) Modeling some effects of frontal lobe damage—novelty and perseveration. *Neural Networks* 2(2): 103-116.
- Liddell, E. G. T. & Sherrington, C. (1924) Reflexes in response to stretch (myotatic reflexes). *Proceedings of the Royal Society of London. Series B, Containing Papers of a Biological Character* 96(675): 212-242.

## Practopoiesis

- Lieberman, M. D. (2007) Social cognitive neuroscience: A review of core processes. *Annual Review of Psychology* 58:259–89. 10.1146/annurev.psych.58.110405.085654
- Maturana, H. R. & Varela, F. J. (1980) Autopoiesis and cognition: The realization of the living. Vol. 42. Springer.
- Maturana, H. R. & Varela, F. J. (1992) The tree of knowledge: the biological roots of human understanding (Rev. ed.). Boston: Shambhala.
- Mayer, J. S., Bittner, R. A., Nikolić, D., Bledowski, C., Goebel, R. & Linden, D. E. (2007) Common neural substrates for visual working memory and attention. *Neuroimage* 36(2): 441-453.
- McCloskey, M. & Cohen, N. (1989) Catastrophic interference in connectionist networks: The sequential learning problem. In G. H. Bower (ed.) *The Psychology of Learning and Motivation* 24: 109-164.
- McEwen, B.S. & Stellar, E. (1993) Stress and the individual. Mechanisms leading to disease. *Archives of internal medicine* 153 (18): 2093–101. PMID 8379800.
- McGann, M., De Jaegher, H. & Di Paolo, E. A. (2013) Enaction and psychology. *Review of General Psychology* 17(2). <http://dx.doi.org/10.1037/a0032935>
- Miller, G. A. (1956) The magical number seven, plus or minus two: some limits on our capacity for processing information. *Psychological Review* 63(2): 81.
- Mitchell, T. M. (1980) The need for biases in learning generalizations (pp. 184-191). Department of Computer Science, Laboratory for Computer Science Research, Rutgers Univ.
- Mozzachiodi, R. & Byrne, J. H. (2010) More than synaptic plasticity: role of nonsynaptic plasticity in learning and memory. *Trends in Neurosciences* 33(1): 17-26.
- Nikolić, D. & Singer, W. (2007) Creation of visual long-term memory. *Perception & Psychophysics* 69(6): 904-912.
- Nikolić, D. (2010) The brain is a context machine. *Review of Psychology* 17(1): 33-38.
- Noble, D. (2008a) *The music of life: biology beyond genes*. Oxford University Press.
- Noble, D. (2008b) Claude Bernard, the first systems biologist, and the future of physiology. *Experimental Physiology* 93(1): 16-26.
- Noë, A. (2012) *Varieties of Presence*. Cambridge, MA: Harvard University Press. ISBN 9780674062146.
- Olsson, H. & Poom, L. (2005) Visual memory needs categories. *Proceedings of the National Academy of Sciences of the United States of America* 102(24): 8776-8780.
- Paivio, A. (2007). *Mind and its evolution: A dual coding theoretical approach*. Mahwah, NJ. Lawrence Erlbaum Associates.
- Parks, R. W., Levine, D. S., Long, D. L., Crockett, D. J., Dalton, I. E., Weingartner, H., ... & Becker, R. E. (1992) Parallel distributed processing and neuropsychology: A neural network model of Wisconsin Card Sorting and verbal fluency. *Neuropsychology Review* 3(2): 213-233.
- Peirce, C. S. (1903) *Harvard lectures on pragmatism, Collected Papers v. 5*.
- Popper, K.R. (1999) Notes of a realist on the body–mind problem. *All Life is Problem Solving* (A lecture given in Mannheim, 8 May 1972 ed.). Psychology Press.
- Posner, M. I. & Petersen, S. E. (1990) The attention system of the human brain. *Annual Review of Neuroscience* 13: 25–42.
- Powers, W. T. (1973) *Behavior: The control of perception*. Chicago: Aldine de Gruyter. ISBN 0-202-25113-6.
- Ratcliff, R. (1990) Connectionist models of recognition memory: Constraints imposed by learning and forgetting functions. *Psychological Review* 97: 285-308.
- Rosenblatt, F. (1958) The perceptron: a probabilistic model for information storage and organization in the brain. *Psychological Review* 65(6): 386.
- Rummelhart, D. E., Hinton, G. E. & Williams, R. J. (1986) Learning representations by back-propagating errors. *Nature* 323(9): 533-535.
- Rust J. (2009) John Searle. Continuum International Publishing Group. pp. 27–28. ISBN 0826497527.
- Schacter, D. L., Norman, K. A. & Koutstaal, W. (1998). The cognitive neuroscience of constructive memory. *Annual Review of Psychology* 49(1): 289-318.
- Searle, J. (1980) Minds, Brains and Programs. *Behavioral and Brain Sciences* 3(3): 417–457, doi:10.1017/S0140525X00005756
- Searle, J. (2009) Chinese room Argument. *Scholarpedia* 4(8):3100
- Shiffrin, R. M. & Schneider, W. (1977) Controlled and automatic human information processing: II. Perceptual learning, automatic attending, and a general theory. *Psychological Review* 84: 127–190.
- Shipp, S., Adams, R. A. & Friston, K. J. (2013) Reflections on a granular architecture: predictive coding in the motor cortex. *Trends in Neurosciences* 36(12): 706-716.
- Simon, H. A. (1994) Near decomposability and complexity: How a mind resides in a brain. In: *The Mind, The Brain, and Complex Adaptive Systems*. Eds.: Harold J. Morowitz and Jerome L. Singer. SFI studies in the sciences of complexity, Vol XXII, Addison-Wesley.
- Squire, L. R. (1992) Memory and the hippocampus: a synthesis from findings with rats, monkeys, and humans. *Psychological Review* 99(2): 195.
- Sterling, P. (2004) Principles of Allostasis: Optimal design, predictive regulation, pathophysiology, and rational therapeutics. IN: Schulkin, J. (Ed.). *Allostasis, homeostasis, and the costs of physiological adaptation*. Cambridge University Press: Cambridge, UK.
- Sterling, P. & Eyer, J. (1988) Allostasis: A new paradigm to explain arousal pathology. In: S. Fisher and J. Reason (Eds.), *Handbook of Life Stress, Cognition and Health*. John Wiley & Sons, New York.
- Sternberg R.J., Davidson J.E., eds. (1995) *The nature of insight*. Cambridge (Mass.): MIT Press.
- Thayer, J. F. & Lane, R. D. (2000) A model of neurovisceral integration in emotion regulation and dysregulation. *Journal of Affective Disorders* 61(3): 201-216.

## Practopoiesis

- Treisman, A. (1985) Preattentive processing in vision. *Computer Vision, Graphics, and Image Processing* 31(2): 156-177.
- Treisman, A. M., & Gelade, G. (1980) A feature-integration theory of attention. *Cognitive Psychology* 12(1): 97-136.
- Turrigiano, G. (2012) Homeostatic synaptic plasticity: local and global mechanisms for stabilizing neuronal function. *Cold Spring Harbor perspectives in biology* 4(1).
- Turrigiano, G. G. & Nelson, S. B. (2004) Homeostatic plasticity in the developing nervous system. *Nature Reviews Neuroscience* 5(2): 97-107.
- V. Braintenberg (1984) *Vehicles: Experiments in synthetic psychology*. Cambridge, MA: MIT Press
- Varela, F. J., Thompson, E., & Rosch, E. (1991) *The embodied mind: cognitive science and human experience*. Cambridge, Mass.: MIT Press.
- von Foerster, H. (2003) Cybernetics of cybernetics. In *Understanding Understanding* (pp. 283-286). Springer New York.
- Wiener, N. (1961) *Cybernetics: On the Control and Communication in the Animal and the Machine*. MIT Press. ISBN 0-262-73009-X
- Wise, R.A. (1996) Addictive drugs and brain stimulation reward. *Annual Review Neuroscience* 19: 319–40. doi:10.1146/annurev.ne.19.030196.001535. PMID 8833446
- Xu, T., Yu, X., Perlik, A. J., Tobin, W. F., Zweig, J. A., Tennant, K., ... & Zuo, Y. (2009) Rapid formation and selective stabilization of synapses for enduring motor memories. *Nature* 462(7275): 915-919.
- Yoshitake, K., Tsukano, H., Tohmi, M., Komagata, S., Hishida, R., Yagi, T. & Shibuki, K. (2013) Visual Map Shifts based on Whisker-Guided Cues in the Young Mouse Visual Cortex. *Cell Reports* 5(5): 1365-1374.



|                      | T <sub>0</sub> | T <sub>1</sub> | T <sub>2</sub> | T <sub>3</sub> |
|----------------------|----------------|----------------|----------------|----------------|
| cybernetic knowledge | ✓              | ✓              | ✓              | ✓              |
| variety              | ✓              | ✓              | ✓              | ✓              |
| information          | ✓              | ✓              | ✓              | ✓              |
| control              | —              | ✓              | ✓              | ✓              |
| supervision          | —              | —              | ✓              | ✓              |
| anapoiesis           | —              | —              | —              | ✓              |
| homeostasis          | —              | ✓              | ✓              | ✓              |
| allostasis           | —              | —              | ✓              | ✓              |
| peristasis           | —              | —              | —              | ✓              |
| storage of knowledge | ✓              | ✓              | ✓              | ✓              |
| knowledge deduction  | —              | ✓              | ✓              | ✓              |
| knowledge induction  | —              | —              | ✓              | ✓              |
| knowledge abduction  | —              | —              | —              | ✓              |

**Table 1.** Properties of systems that exhibit different number of traverses, from zero traverses (T<sub>0</sub>) to three traverses (T<sub>3</sub>). All systems possess cybernetic knowledge and variety. However, with increased number of traverses the adaptive capabilities increase. For example, only a T<sub>3</sub>-system or higher is able to perform anapoiesis (see text for explanation).

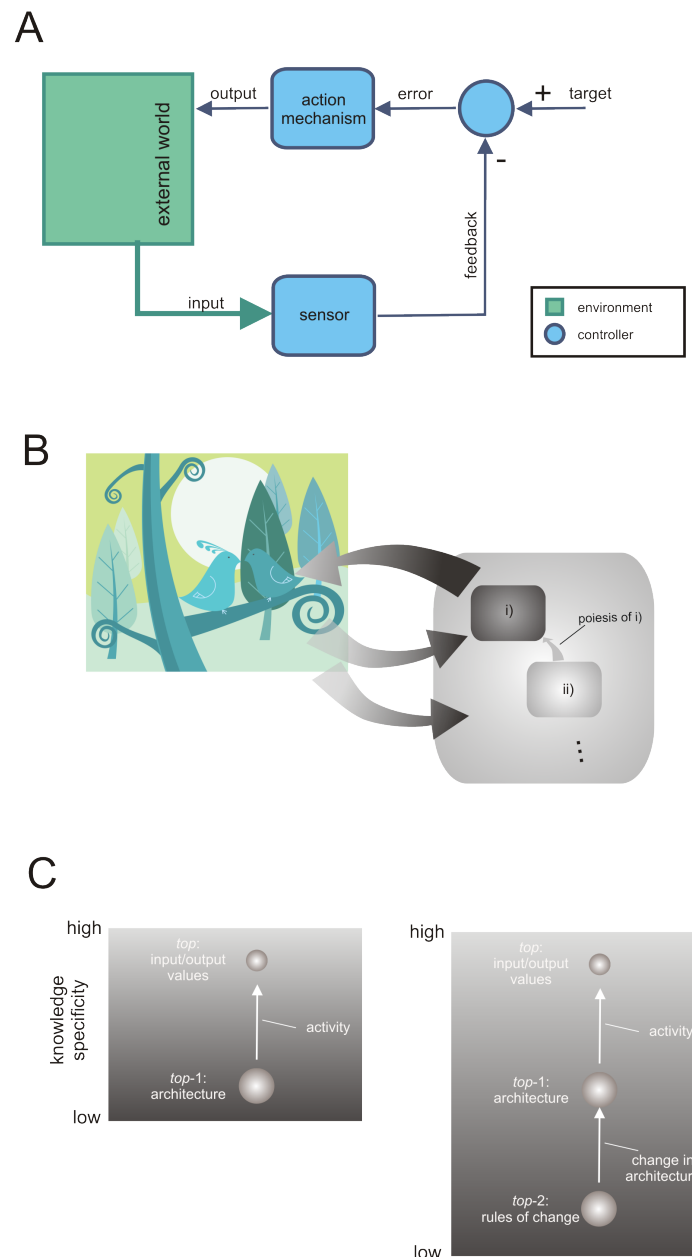

**Figure 1:** Cybernetic systems and the acquisition of cybernetic knowledge through practopoiesis. A) Interaction graph of a classical cybernetic control system implementing monitor-and-act machinery. B) The basic principle of practopoietic acquisition of cybernetic knowledge. If subsystem i) represents a classical cybernetic system like the one in A) and operates at a higher level of organization, the subsystem ii) operates at a lower level of organization to make changes to i) such that i) obtains proper cybernetic knowledge. Actions performed by ii) have poietic effects on i) and for that require feedback from the environment (dashed arrow). The three dots indicate that this organizational relationship can be generalized as yet another subsystem may provide cybernetic knowledge for ii). C) Graphs of the relationships in the specificity/generality of cybernetic knowledge or *knowledge graphs*, shown for the components of systems in A) (left) and B) (right). Left: The system exhibits two levels of knowledge, i.e. two levels of organization (spheres): It contains general knowledge about the rules of control in the form of the system architecture, and more specific knowledge about the current states in the form of its input/output values. The arrow indicates the transition i.e., *traverse*, of knowledge from general to specific, which is a function of the operation of the system. Right: The system has one more level of organization and thus, one more traverse. The most general knowledge is that containing the rules for changing system architecture. The levels of organization are indicated by *top*, *top-1*, etc. The relative sizes of spheres indicate the total amount of knowledge stored at each level of organization i.e., its cybernetic variety.

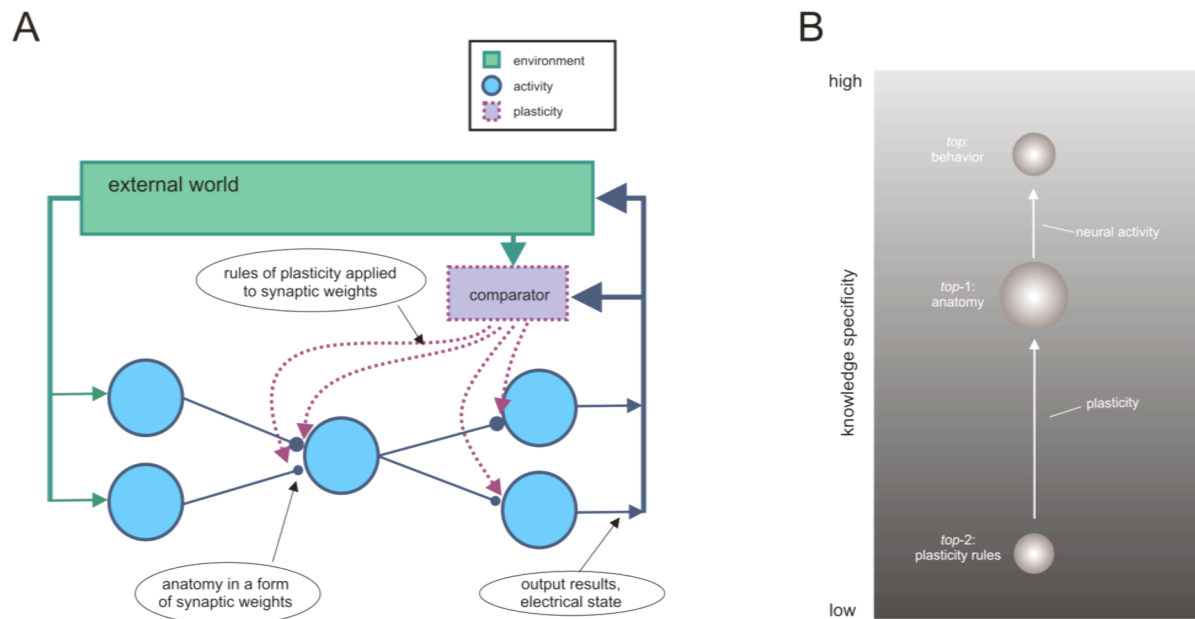

**Figure 2:** Example systems that exhibit one step more adaptability than classical cybernetic systems. A) the interaction graph of various components underlying supervised learning in back-propagation and similar algorithms for learning in neural networks. Blue: the top mechanism that implements an input-output function with the environment. Purple: an adaptive mechanism at a lower level of organization that provides cybernetic knowledge for the top in a form of synaptic weights. Green: environment from which both mechanisms obtain feedback. B) Adaptive function of plasticity mechanisms in natural neural networks shown as the relationship of the specificity of cybernetic knowledge. There are three levels at which knowledge is stored i.e., three organizational levels, and two types of mechanisms that enable traverse from general to specific knowledge: plasticity rules are needed for creating network anatomy, and network anatomy is needed for creation of behavior.

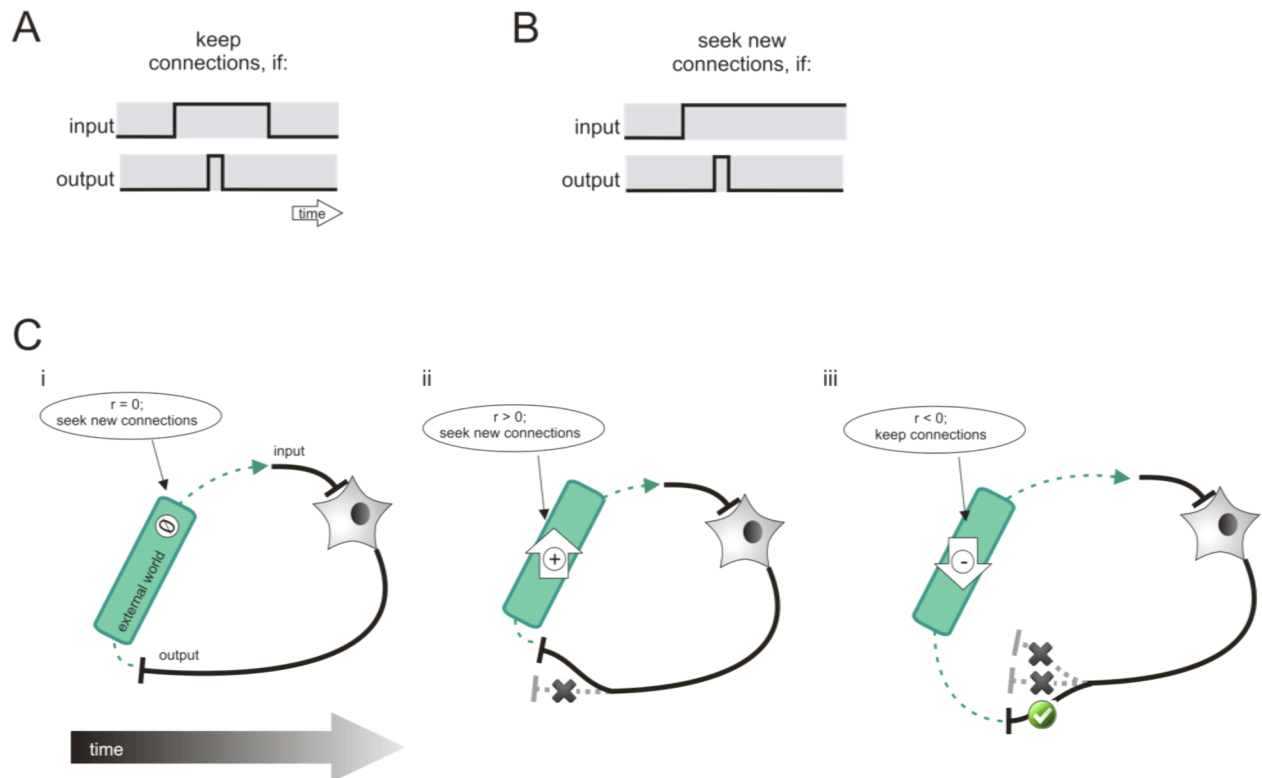

**Figure 3:** Creation (poiesis) of a functional reflex arc in a two-traversal system by applying hypothetical plasticity rules that rely on eco-feedback. **A)** The plasticity rule to keep or strengthen connections: A contingency is sought in which an input produces output and is quickly followed by a removal of the input. This is taken as an indicator that a neuron's actions remove the transpiring inputs, which is in turn an indicator of a good performance of the reflex. **B)** The plasticity rule to dispose connections and seek new ones: The output of a neuron is not followed by a removal of the input. **C)** A hypothetical sequence of events in the process of poiesis of a monitor-and-act unit at a higher level of organization (reflex) by the actions at a lower level of organization (plasticity rules): i) At first, there is no detectable contingency between input and output. ii) This prompts the neuron to abandon existing synapses and to seek new ones. A new one may produce contingencies but not necessarily a desirable one (e.g., forming a positive rather than a negative feedback loop). iii) A further search for a synapse finally results in a desirable negative feedback loop, and is kept and maintained.



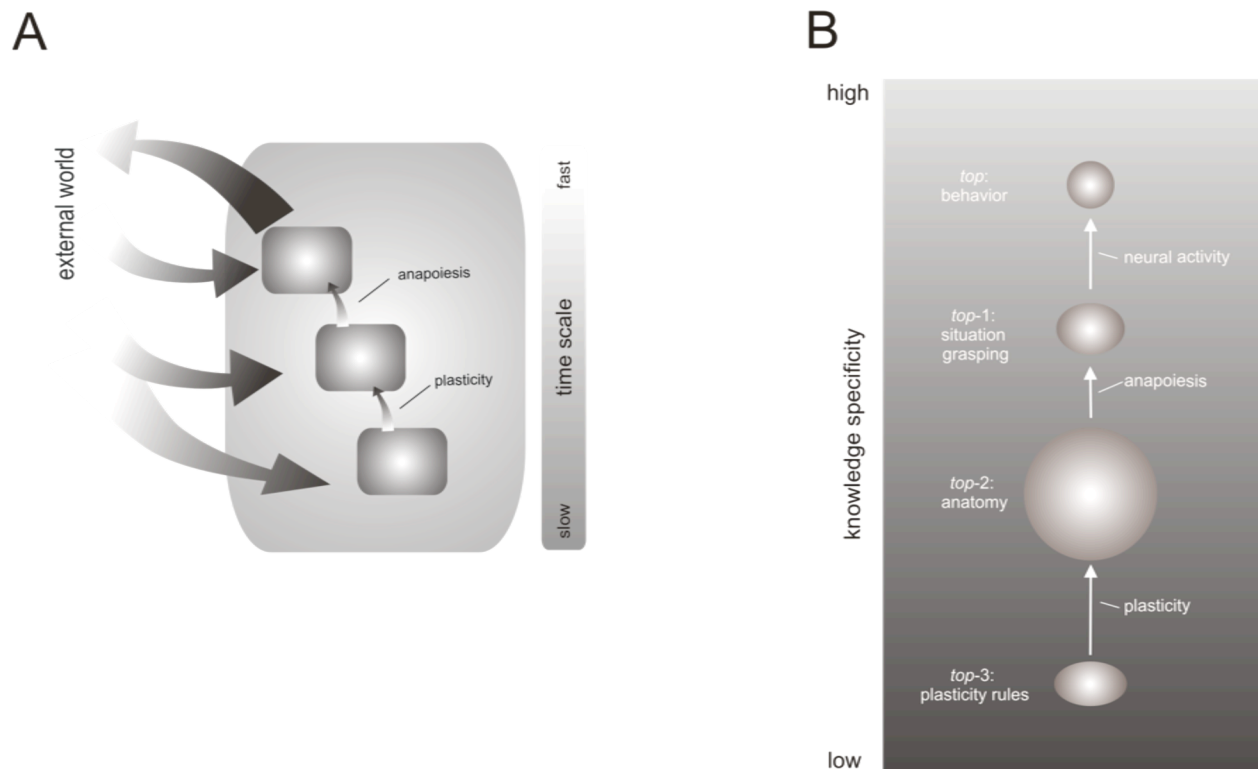

**Figure 4:** A tri-traversal system obtained by inserting a traverse in-between plasticity and neural activity. Such a system implements *anapoiesis* as a middle traverse that lies between plastic changes creating anatomy and neural activity creating behavior. Anapoiesis extracts knowledge about the current situation and may be the missing component needed to account for human cognition. A) An interaction graph indicating that anapoiesis needs its own feedback from environment in order to grasp the current situation. The time scales indicate that situation grasping is mostly a quicker process than extraction of network anatomy, but also a slower process than the sensory-motor loops of neural activity needed to generate behavior. B) The four levels of organization and the corresponding three traverses shows in a knowledge graph. Knowledge extracted by anapoiesis is more specific than the knowledge stored in the anatomy of the system, but is more general than that extracted by neural activity.

<sup>1</sup> Monitor-and-act components offer a much more complete descriptor of an adaptive system than the concept of represented information. The latter requires additional mechanisms to be defined for encoding and decoding information. In other words, besides the memory, a mechanism for computation is required—something that has the knowledge of the code. In contrast, a monitor-and-act unit houses both “memory storage” and “processor” under the same roof. It is a complete action system that autonomously performs the entire cycle of detecting information, acting on it and observing the effects of the action.

<sup>2</sup> The practopoietic process is very much different from building a system from a pre-defined plan. When building predefined systems no feedback is needed. In contrast, during the knowledge acquisition of poiesis low-level components receive environmental feedback that <sup>2</sup> The practopoietic process is very much different from building a system from a pre-defined plan. When building predefined systems no feedback is needed. In contrast, during the knowledge acquisition of poiesis low-level components receive environmental feedback that necessarily guides the creation of new structures.

<sup>3</sup> High and low levels of organization in practopoiesis may seem counterintuitive and they may stand in opposition to traditional definitions of hierarchies in the brain whereby the highest element is the one that has the most decision power. These are hierarchies of power control. In contrast, practopoiesis is a hierarchy of organization levels. In practopoiesis, the more highly organized component is the one that cannot operate without the guidance of the lower one. For example, one may see genes as having very high decision power, higher than e.g., behavior: Genes can determine behavior and behavior cannot directly determine genes. Nevertheless, genes operate at a lower level of system organization than does behavior. Similarly, in a management structure of a social organization, the highest decision power (e.g., a CEO) does not coincide with the highest level of system organization. The result of the collective action of all the employees may constitute a much higher form of organization than the guiding actions of the CEO. The main concern of practopoietic theory is the level of organization, rather than the decision power.

<sup>4</sup> Note that what is considered as the *top* organization level of a system is relative and depends on what has been chosen to be considered as a system. For example, if an organism is considered as an adaptive system, then its *top* level corresponds to its behavior and the environment with which it interacts corresponds to the world surrounding the organism. But if a cell within that organism is the object of the analysis or an organ of an organism, then the *top* levels corresponds to the functions of those cells/organs and the environments with which they interact include other cells and other organs within the organism. Similarly, a system that transcends a single organism can be the object of the analysis, such as for example, a human+machine system, or a social organization consisting of multiple human members. In those cases the top levels of organization may be different from those of individual organisms and so may be different the environments with which those systems interact.

<sup>5</sup> Hence *top* level may exert poietic effects possibly only on its environment.

<sup>6</sup> Traverse takes place already at the lowest levels of system organization. For example, the process of evolution by random change and selection is a traverse too: A general knowledge of evolvability (Kirschner & Gerhart 1998) is used to extract a more specific knowledge about the actual evolved properties of the system (e.g., a genome). Whether an individual successfully procreates or not is a form of feedback obtained from the environment, and requires involvement of the top level of organization i.e., behavior. That way, cybernetic knowledge can be acquired through evolution and stored in the genome and organelles.

<sup>7</sup> For example, in artificial neural network a single rule for plastic changes can be applied to many synapses and, hence may allow acquisition of large amounts of knowledge. Thus, low variety in terms of plasticity rules may result in a large variety in terms of connectivity matrix. Another, even more extreme example is evolution by natural selection whereby application of a single set of rules—random change combined with natural selection—produced an entire kingdom of living forms on the planet earth.

<sup>8</sup> This is similar to the difference between a lookup table (fast access but large storage resources) and computation on the spot (slower access but a leaner and more flexible system). Thus, instead of a series of if-then statements, as in an expert system, an adaptive system relies on general rules applied in each situation de novo in order to help infer the next action. A key difference to computer algorithms is that most of the variety in computer software is generated by traverses executed by the brains of human operators. Intelligent adaptive systems do not have this external help but have to adjust on their own.

<sup>9</sup> Although, it would be possible, in theory, to equip a single-traverse system with all the necessary knowledge for all the possible events, this works well only for simple artificial environments. Under real-life conditions, as are the survival conditions for a mammal on the planet earth, the combinatorial explosion of the number of possible situations that the system may encounter is too large. Consequently, the system has to rely on abstract rules and extraction of knowledge at multiple levels of organization and thus, on the use of multiple traverses.

<sup>10</sup> The number of levels of organization in a system that are prominent and that play an important role in the system will necessarily be small. There are good reasons for this: Each level requires excessive resources and extensive knowledge acquisition. To be influential, an organization level must possess large cybernetic variety. There is always a possibility that certain parts of the system organize themselves into an even large number of levels of organization and thus, form deeper adaptive structures. However, these parts of the system may rely on small variety and hence, play a relatively small role in the overall adaptability of the system. In other words, to near-decompose the system effectively, we are interested in a small number of organization levels that account for most of the system’s cybernetic variety.

<sup>11</sup> The units operating equi-level can interact directly like for example, neurons connected through axons and dendrites, or genes that control expression of other genes. Notably, these direct interactions do not bring additional levels of practopoietic adaptability to the system. These interactions are important to provide much of the needed variety to the system.

<sup>12</sup> Note that the processing stages of neural networks (such as layers of a perceptron (Rosenblatt 1958), or stages of the processing streams in the cortex (Hubel & Wiesel 1962) form a hierarchy that is different from that of practopoietic systems. The membranes of two neurons may operate poietically at the same level, although one neuron may be located at a higher brain area than the other. For example, a cortical neuron is phylogenetically and ontogenetically higher than a spinal neuron and yet, the inhibition/excitation mechanisms of the two operate

equi-level, while their respective plasticity mechanisms lie at a practopoietically lower level, and they both also operate equi-level. Similarly, the “classical” hierarchy of processing stages in vision: retina>LGN>V1>V2>...>IT is not a poietic hierarchy.

<sup>13</sup> One consequence of multiple levels of organization is that often an adaptive system can neither be built quickly nor can it make large adjustments quickly. Instead, the system must proceed in steps of small changes, each being subjected to verification and further adjustments. Much like the evolution of complex species can occur only slowly (Darwin 1859), the growth and learning of a highly organized organism (or any other adaptive intelligent system) must progress in small steps. New structures are built gradually on top of the existing ones. Extensive changes require time.

In case that the situation does not allow time for changes, or the changes cannot be achieved at all, the system can be said to experience stress. The system makes changes that are not fully optimized and not enough time is given to reach the best possible balance of all cybernetic knowledge. Some functionality (i.e., health) is necessarily sacrificed. In worst case, the system may not be successful; an organism dies prematurely, or a species gets extinct.

<sup>14</sup> An additional organization level may be provided below plasticity by the so-called phenomenon of metaplasticity, or plasticity-of-plasticity (e.g., Abraham & Bear 1996). However, currently it is not known whether these mechanisms involve eco-feedback at all the levels of organization (i.e., at all levels of plasticity), which would be required in order to qualify as a multi-level practopoietic system.

<sup>15</sup> Note that the total count of cells alone is not sufficient to produce all the necessary variety. The cells need to be equipped also with the correct cybernetic knowledge. The content of that knowledge is crucial in determining the total intelligence of the system. This is because systems may differ in how good models of the surrounding world they. This is why a human, although equipped with a smaller brain than e.g. a whale, can exhibit in many aspects more intelligent behavior than a whale.

<sup>16</sup> Mechanisms responsible for a positive feedback loop can be equally so considered as  $T_1$ . For example, mechanisms that evoke emotions may evoke behavior that further intensify the same emotions, acting thus in a positive feedback loop (Thayer & Lane 2000). In those cases monitor-and-act components make a certain response progressively step-up and these increases may be of equal importance for the survival of an organism as negative feedback-based homeostatic regulations.

<sup>17</sup> Devices that we build are set to interact with the environment by producing a single traverse—often, a part of the interaction is a human operator/user. For example, a TV-set is made to interact with its human environment as to get inputs (through button presses) and to deliver outputs (sound, picture). With very few exceptions, our technology improves through an increase in cybernetic variety, not through an increase in the degree of adaptability. That is, the machinery is not being added new traverses. Rather, the number of different responses across different situations is increased. New circuitry is added by human engineers, not by the system that would find ways to improve by itself. Hence, von Neumann computer architecture is used almost exclusively as a high-variety but not a high-adaptability system—keeping its operations mostly at the  $T_1$ -level.

<sup>18</sup> While in the pre-industrial era  $T_0$ -artifacts dominated the human civilization in forms of various energy-passive objects such as tools, books, houses, and cold weapons, the industrial and information era brought extensive use of energy-consuming devices and thus, proliferation of  $T_1$ -systems. Any other adaptive needs that exceed  $T_1$  rely mostly on human operators, whose minds operate with more traverses.

Similarly, our formal mathematical tools for scientific and engineering descriptions are mostly suitable for describing operations of  $T_1$ -systems. We use an equation to make inferences and decisions, the application of which is often a  $T_1$ -system. The system describes a traverse from a general rule specified by the equation to the specifics of input and output values. By that token a hand-held calculator is a  $T_1$ -system, and equally so is a complex calculation implemented in a spreadsheet software. In general, a formal logical system with premises and conclusions is a  $T_1$ -system, whereby a single traverse suffices to derive a conclusion from the premises. Whereas the discipline of mathematics requires much more than  $T_1$  for creative formulation of problems and insights on possible solutions, in the end, solutions and proofs are reduced down to a set of  $T_1$  operations. Whenever the human mind operates logically, its high-level adaptive capabilities are reduced to much less adaptive (but usually more reliable)  $T_1$ -operations.

<sup>19</sup> This number could easily exceed the number of atoms in the universe. Hence, it is not possible to device a physical storage or the needed information, not to mention the impossibility of conceiving a mechanisms by which this knowledge would be acquired. For example, there would be not enough time in the age of the universe to acquire such knowledge by a process of evolution by natural selection.

<sup>20</sup> The so-called Hebbian learning mechanisms (Hebb 2002), are not likely to contribute alone considerably the adaptability levels of the system i.e., to the anapoiesis. There are two possible limitations. First, the type of information that they consider is not highly sensitive to environmental influences. For example, spike-timing dependent plasticity (Bi & Poo 1998), which is a form of Hebbian learning, detects the timing relationships between pre- and post spike-synaptic spike. It is unlikely that this timing provides information about the properties of the environment (Turrigiano & Nelson 2004). Hence, Hebbian learning is not designed for closure of practopoietic cycle of cautions with the external events. The second limitation of Hebbian mechanisms is that it is not clear whether they are capable of altering their properties if the circumstances in the environment require so. For example, if the environment’s properties change, thus invalidating the application of Hebbian rules (e.g., maybe now the organism would do better by applying anti-Hebbian learning instead), there is no way for the system to adjust to that change in the environment.

The primary benefit that Hebbian learning mechanisms provide is variety; A system with a Hebbian learning mechanism can produce a larger variety of behaviors than the same system lacking such a learning mechanism. A network that forms a  $T_1$ -system with an addition of a non-adaptive learning mechanism remains a  $T_1$ -system. Learning rules other than Hebbian may be more suited for achieving adaptability of the system. For example, a hypothetical mechanism based on timing relations between input and output spikes described in Figure 3 is in a better position to use feedback from environmental than is Hebbian learning.

<sup>21</sup> For example, a learning rule (*top-2*) such as the one in Figure 3 may be implemented to detect that operations are suboptimal, which then results in changes made at the level of anatomy (*top-1*). These changes in turn affect how behavior is produced (*top*) in order to satisfy the needs of the organism. Thus, an allostatic change at one level (e.g., network anatomy) keeps another variable constant (e.g., supply of nutrition to the organism).

<sup>22</sup> In human-made machinery, implementations of  $T_2$ -systems exist but are rare and almost exclusively limited to control based on a single variable. Thus, at the level of supervision, these  $T_2$ -systems exhibit a minimum of cybernetic variety. Examples include various

servomechanisms—e.g., temperature (car engine, computer processor), speed (cruise control) or angular position (robotic arm). These mechanisms usually ensure proper functioning of another process that itself closes a loop with the environment and can be described as  $T_1$  (the operations of the car, computer, robot), making it in total a  $T_2$ -system. To the best of the author's knowledge, no variety-rich engineered  $T_2$ -system exists. That is, no artificial system with two traverses contains extensive cybernetic knowledge at the lower traverse. Another example of high-hierarchy but relatively low-variety interaction systems may be management hierarchies in social organizations, in which usually only a few instructions are given by the person in charge as a supervisor, and by the supervisor of a supervisor, and so on (note the reversal of practopoietic and social hierarchies, note 22).

<sup>23</sup> One commonly encountered problem in pattern recognition is the so-called *stability-plasticity dilemma* (Grossberg 1987), also known as *catastrophic interference* (McCloskey & Cohen 1989; Ratcliff 1990). As  $T_1/T_2$ -networks learn new datasets, they forget the old ones. The level *top-1* forgets what it has known earlier. For  $T_2$ -systems, to acquire two different types of responses for two different datasets, their samples need to be intermixed, avoiding any temporal grouping—a requirement in discord with the real life.

<sup>24</sup> To reconstruct that knowledge at the *top-1* level of organization and to use it for controlling behavior, the system still needs to interact with the environment, but this time in a more efficient way. The system may initiate a poietic process from a simple hint from the environment and then seek eco-feedback about the efficiency of its reconstructive operations again from a relatively modest and quickly accessible environmental sources.

<sup>25</sup> The development of an organism is an anapoietic process. The process of evolution can be considered as a traverse—i.e., the lowest traverse of a species-individual system. If the individual has at least an adaptability level of  $T_2$ , the species as a whole, including its evolution, exhibits the adaptive level of  $T_3$  (and if the organism is  $T_3$ , as argued later in the text, the species as a whole would be  $T_4$ ). This means then that the traverse from genes to the anatomy of the system exhibits anapoiesis. For example, the growth of an oak tree is an anapoietic process from general knowledge on how to build an oak tree stored in genes to the actual instantiation of the oak. This reconstruction process involves interaction with the environment and thus, the actual outcome is somewhat different in each instance, depending on the properties of the environment. For example, to maximize the amount of exposure to sunlight, shapes of branches and orientations of leaflets may vary depending on the given situation. The same holds for the growth of other organisms. The anapoiesis of the organism depends on the environment. For example, the animal's fur may grow thicker in colder environment, or the liver can grow larger for a certain diet (Fris 2004).

Anapoiesis is responsible for different phenotypes given the same genotype. Phenotype does not come from a pre-determined plan in genes. Genes create structure through feedback processes and regulation. Thus, the amounts of various created structures depend largely on the properties of the environment. In identical environments, identical phenotype would be obtained for the same genotype, but when properties of the environment vary, as in the real life, also phenotypes necessarily vary. Perhaps the most sensitive aspect of our anatomy to environmental factors, the one that is made to be susceptible as much as possible, are the anatomical structures that store our long-term memories. Everything that we learn is in effect a phenotype of the learning rules stored in the genotype.

Hence, also anapoiesis is the schooling-based transfer of knowledge from one generation to the next. Parents can educate their offspring by conveying knowledge not transferable through genes. This may include learning how to open a nut, hunt, use language, or appreciate music. This knowledge, provided during upbringing, is necessarily stored at higher levels of system organization than genes. Our culture is essentially anapoietic—it has to be re-created in every new individual. It is a form of phenotype (or extended phenotype; Dawkins 1999; Dawkins 2004). Anapoiesis makes it possible to skip the tedious process of rediscovering knowledge from scratch. Instead, a poiesis of specific knowledge is propelled by combining the inborn general cybernetic knowledge with a stimulating environment provided by the environment.

<sup>26</sup> A  $T_2$ -system i.e., a system without anapoiesis, cannot adjust to new properties of the environment—an equivalent of a new situation—without forgetting how it had adjusted to the previous properties of the environment. To be able to enter a new dataset abruptly and to adjust *top-1* accordingly at a momentary notice, an elaborate *top-2* must be developed. Hence, a  $T_3$ -system exhibiting anapoiesis may be required.

<sup>27</sup> Miller (1956) was the first to point to the reconstruction in working memory (or short-term memory) from long-term memory. He noticed that the memory capacity for a string of letter was higher if it contained familiar combinations of letter (e.g., IBMFBKGB) than if it was completely random. He referred to this process of organizing the stimulus as “chunking” and noted that it required existing knowledge already stored in long-term memory. According to practopoietic theory, this is the process of anapoiesis from long-term memory to working memory. Later, similar properties have been shown for working memory storage in vision (Alvarez & Cavanagh 2004; Nikolić & Singer, 2007), and that visual chunking cannot be made by combining any raw individual visual features but categories of objects must exist in long-term memory (Olsson & Poom 2005). Thus, the limitations in the capacity of working memory seem to be limited by what can be reconstructed from long-term memory.

<sup>28</sup> The distinction between automatic and controlled processes is the most pervasive dichotomy in psychological science. This distinction has been rediscovered multiple times and has been characterized under different names, such as automatic vs. controlled processes (Shiffrin & Schneider 1977), System 1 vs. System 2 (Stanovich & West 2000), intuition vs. reasoning (Kahneman 2003, 2011), verbal vs. non-verbal (Paivio 2007), bottom-up vs. top-down (Posner & Petersen 1990), pre-attentive vs. attentive (Julesz 1984; Treisman 1980, 1985), unconscious vs. conscious (Freud 1915/2005), dual processes (James 1890), effortless vs. effortful (Hasher & Zacks 1979), and reflexive vs. reflective (Lieberman 2007). The common property of automatic, intuitive, pre-attentive processes is that they are fast, require little attention, exhibit high processing capacity, and are resilient to disturbances. These processes are also associated with little experience of effort. Their main shortcoming is a relative lack of flexibility. When we need a new type of behavior that has not been executed or well-learned in the past, we engage controlled attentive processes and reasoning. These mental activities complete tasks with slower pace, exhibit less processing capacity, are more prone to error in case of distraction, and are associated with conscious experience of effort. For example, driving a car to work may be automatic and effortless, but driving in a new city may require focus and attention.

<sup>29</sup> Attention shares a lot of properties and resources with working memory (e.g., Baddeley 1993; Awh & Jonides 2001; Mayer et al. 2007) so that it is often not clear whether these are two separate phenomena or just different sides of the same phenomenon. For example, the larger the working memory capacity for a certain type of stimuli, equally so much faster is the visual search for those stimuli in an attentional task (Alvarez & Cavanagh 2004). According to the practopoietic theory, the shared mechanism behind these phenomena is the anapoietic reconstruction of knowledge.



---

<sup>30</sup> Searle illustrates this by putting a human into a hypothetical situation in which the person follows blindly rules for mapping from input set of Chinese characters to output set of Chinese characters. Importantly, the person is not Chinese speaking. Thus, by making these rules elaborate enough and following them accurately, an outside observer may have the appearance that the person is acting intelligently and is thinking, whereas in fact, the person has no understanding whatsoever of the context of the messages. Searle concludes that this proves that such programmed symbolic rules, although possibly appearing to generate intelligent behavior from outside, cannot be sufficient to produce an AI system capable of human-like understanding and thinking.

Notably, it follows from practopoietic theory that such a rule-based system is not even possible to program in practice for real-life problems but only for simplified toy problems. The insurmountable limitation is in the total amount of cybernetic knowledge that would need to be stored. The total number of possible situations i.e., possible sentences to be answered intelligently, using Chinese characters is too large to be programmed by rules and if stored in a  $T_1$ -system, the requirements for the amount of needed memory storage may exceed the size of the universe. Thus, human-like level of intelligence can be achieved only if the system stores knowledge in a sufficiently generalized form, can extract and adjust this generalized knowledge on its own, and has the capability of applying it to specific situations. This requires a  $T_3$ -system.
